## Reconstruction and deconstruction of human somitogenesis in vitro

**Authors:** Yuchuan Miao<sup>1</sup>, Yannis Djeffal<sup>1+</sup>, Alessandro De Simone<sup>2+</sup>, Kongju Zhu<sup>1</sup>, Andrew Silberfeld<sup>1</sup>, Jong Gwan Lee<sup>1</sup>, Jyoti Rao<sup>1</sup>, Oscar A. Tarazona<sup>1</sup>, Alessandro Mongera<sup>1</sup>, Pietro Rigoni<sup>1</sup>, Margarete Diaz-Cuadros<sup>1</sup>, Laura Min Sook Song<sup>1</sup>, Stefano Di Talia<sup>2</sup>, Olivier Pourquié<sup>1,3\*</sup>

### **Affiliations:**

<sup>1</sup> Department of Genetics, Harvard Medical School and Department of Pathology, Brigham and Women's Hospital, Boston, MA, USA

<sup>2</sup> Department of Cell Biology, Duke University Medical Center, Durham, NC, USA

<sup>3</sup> Harvard Stem Cell Institute, Harvard University, Cambridge, MA USA

\*Correspondence to:

O. Pourquié ([pourquie@genetics.med.harvard.edu](mailto:pourquie@genetics.med.harvard.edu))

+Equal contribution

### **Abstract:**

The body of vertebrates displays a segmental organization which is most conspicuous in the periodic organization of the vertebral column and peripheral nerves. This metameric organization is first implemented when somites, which contain the precursors of skeletal muscles and vertebrae, are rhythmically generated from the presomitic mesoderm (PSM). Somites then become subdivided into anterior and posterior compartments essential for vertebral formation and segmental patterning of the peripheral nervous system<sup>1-4</sup>. How this key somitic subdivision is established remains poorly understood. Here we introduce novel tridimensional culture systems of human pluripotent stem cells (PSCs), called Somitoids and Segmentoids, which can recapitulate the formation of epithelial somite-like structures with antero-posterior (AP) identity. Using these systems, we identified a key organizing function of the segmentation clock in converting temporal rhythmicity into the spatial regularity of anterior and posterior somitic compartments. We show that an initial salt-and-pepper expression pattern of the segmentation gene *MESP2* in the newly formed segment is transformed into defined compartments of anterior and posterior identity via an active cell sorting mechanism. Moreover, we demonstrate a large degree of independence of the various patterning modules involved in somitogenesis including the segmentation clock, somite epithelialization and AP polarity patterning. Together we put forward a novel framework accounting for the symmetry breaking process initiating somite polarity patterning. Our work provides a valuable platform to decode general principles of somitogenesis and advance knowledge of human development.

43 Our peripheral nerves exhibit a striking periodic organization which coincides with that of  
44 vertebrae. This arrangement can be traced back to the original body segmentation resulting from  
45 somite formation. Somites, which form from the presomitic mesoderm (PSM), define the  
46 prepattern on which vertebral metamery is established<sup>1</sup>. They are repeatedly arrayed in two  
47 bilaterally symmetric columns which give rise to the skeletal muscles and axial skeleton. The PSM,  
48 which is initially mesenchymal in the posterior part of the embryo, becomes progressively  
49 epithelial as it matures. At its anterior tip, somites form rhythmically as epithelial blocks  
50 surrounding a mesenchymal core. The periodicity of somite formation involves a molecular  
51 oscillator called the segmentation clock<sup>1,5</sup>. This oscillator controls the rhythmic activation of Notch,  
52 Wnt and FGF pathways which manifest as traveling waves of target gene expression in the  
53 posterior PSM. These periodic signals are interpreted at the level of the determination front, whose  
54 position is defined by posterior gradients of FGF and Wnt signaling in the PSM. This “Clock and  
55 Wavefront” mechanism eventually leads to the activation of the transcription factor *MESP2* in a  
56 stripe which prefigures the future segment. *MESP2* is next involved in the subdivision of forming  
57 somites into an anterior and posterior compartment<sup>6,7</sup>. This partition is critical for peripheral  
58 nervous system segmentation as the migration of neural crest cells and peripheral axons is initially  
59 restricted to the anterior somitic compartment<sup>8</sup>. It is also essential for vertebrae which form from  
60 the fusion of a posterior somite compartment with the anterior compartment of the next posterior  
61 somite<sup>3</sup>. The mechanism controlling the formation of these anterior and posterior somitic domains  
62 remains poorly understood.

63 Our understanding of vertebrate segmentation only relies on studies performed in model organisms  
64 such as mouse, chicken, and zebrafish embryos. Very little is known about human somitogenesis  
65 which takes place very early during pregnancy, between 3- and 4-weeks post-fertilization<sup>9</sup>. The  
66 recent development of in vitro systems recapitulating paraxial mesoderm development from  
67 pluripotent stem cells (PSCs) demonstrated a high degree of conservation of the gene regulatory  
68 networks involved in PSM patterning between mouse and human embryos<sup>10-15</sup>. Monolayers of  
69 human PSCs differentiating to a PSM fate in vitro recapitulate the posterior FGF and Wnt gradients  
70 and the oscillations of the segmentation clock with a ~5h period. However, a limitation of these  
71 2D systems is that they do not allow examination of the morphogenesis of the tissues generated in  
72 vitro. In mouse, a striking recapitulation of all somitogenesis stages including epithelial somite  
73 and antero-posterior (AP) compartments formation has been achieved in 3D organoids that contain  
74 cells of all three germ layers<sup>16,17</sup>. However, no such protocols have so far been reported for human  
75 PSCs. Thus, whether the mechanisms involved in somite formation and patterning described in  
76 embryos of other vertebrates are conserved in humans remains unknown.

77 To study human somitogenesis, we set out to develop PSC-derived 3D culture systems. We first  
78 generated human iPSC spheroids in suspension, and then treated them with the Wnt agonist CHIR  
79 and the BMP inhibitor LDN for 48 hours to induce the PSM fate (Fig.1a). Subsequently we  
80 transferred the spheroids to a laminin coated substrate and used confocal microscopy to  
81 characterize gene expression dynamics as the spheroids spread out (Extended Data Fig.1a,  
82 Supplementary Video1). We used an iPSC cell line harboring a destabilized Achilles (YFP) reporter  
83 at the *HES7* locus to detect segmentation clock oscillations and a mCherry reporter at the *MESP2*  
84 locus to monitor the onset of segmental determination<sup>10</sup> (Extended Data Fig.1b). Live imaging  
85 showed that *HES7*, a core component of the segmentation clock, starts to oscillate with a 4-5 hour  
86 period (Fig.1b,c, Extended Data Fig.1c) as the spheroids spread out. *HES7* signals initiated from  
87 the peripheral region of the spreading organoid and propagated as concentric waves toward the

88 center (Fig.1b, Extended Data Fig.1c, Supplementary Video2). After about 4 cycles of *HES7*  
89 oscillations, between ~ 64h and 72h, expression of the reporter ceased and the *MESP2* reporter  
90 became simultaneously expressed across spheroids (Fig.1b,c, Supplementary Video2). Thus, the  
91 onset of *MESP2* immediately follows the arrest of *HES7* oscillations. *PAX3* is a transcription factor  
92 first expressed in the anterior PSM and epithelial somites soon after activation of *MESP2*<sup>18</sup>. In the  
93 differentiating organoids of a *PAX3-YFP* reporter line, we observed the onset of *PAX3* activation  
94 in all cells around 78h (Fig.1c). At 90h, numerous *PAX3*-positive somite-like epithelial rosettes  
95 started to emerge and they were visible under bright-field microscopy by 120h (Fig.1d,e). These  
96 rosettes displayed typical somitic features such as enriched apical N-Cadherin and F-actin, a  
97 laminin-rich basal lamina, and a core region filled with mesenchymal cells (Fig.1e-g, Extended  
98 Data Fig.1d,e). We performed RNAseq at 48h, 66h, and 120h of the differentiation protocol, and  
99 observed the expression of signature genes associated with PSM, Determination Front, and somites  
100 respectively (Fig.1h and Extended Data Fig.1f). Therefore, these organoids, which we term  
101 “Somitoids”, successfully recapitulate the timely progression of gene expression from PSM to  
102 somites as well as major aspects of epithelial somite morphogenesis.

103 To explore the role of the segmentation clock in rosette formation, we replaced the coding  
104 sequence of *HES7* with a destabilized Achilles (YFP) reporter to generate a null mutant (Fig.1i).  
105 The YFP signal thus represents the activity of the *HES7* promoter in absence of *HES7* protein, and  
106 we confirmed that the periodic dynamics was ablated (Fig.1j,k, Supplementary Video3). Yet the  
107 *HES7*-null explants proceeded with sequential expression of *MESP2* and *PAX3* followed by rosette  
108 formation as observed in controls (Fig.1j-l). We next generated a *MESP2*-null mutant iPS line  
109 which exhibited normal *PAX3* expression and generated epithelial rosettes similar to wild type  
110 controls (Fig.1m-o). Formation of the rosettes could be blocked without altering *PAX3* expression  
111 by inhibiting myosin contractility using Y-27632 (ROCKi) or Blebbistatin (Fig.1p, Extended Data  
112 Fig.1g). We also dissociated the Somitoids to single cells after rosettes appeared, and then re-  
113 aggregated cells by centrifugation prior to culture (Fig.1q). Strikingly, cells re-formed similar  
114 rosettes in the new aggregates (Fig.1q). Together, these experiments suggest that rosette formation  
115 is an acto-myosin dependent self-organizing property of cells differentiated to the somite stage and  
116 does not depend on a prior prepattern established by the clock and wavefront system.

117 We next investigated whether the epithelial rosettes exhibit an AP polarity as observed in somites.  
118 We used an iPS line harboring a *MESP2* reporter (mCherry) to mark the nascent anterior  
119 compartment and a *UNCX* reporter (YFP) for mature posterior identity (Extended Data Fig.2a). At  
120 120h, we observed rosettes mostly composed of either YFP-high/mCherry-low or mCherry-high  
121 cells (Fig.2a). As reported in mouse embryos, *UNCX* trailed *MESP2* expression in time (Fig.2b,  
122 Supplementary Video4). RNAseq performed on FACS-sorted YFP-high and mCherry-high cell  
123 fractions from 120h cultures showed that they express signature genes associated with posterior  
124 (*UNCX*, *DLL1*) and anterior somite (*FGFR1*, *TBX18*) compartments (Fig.2c, Supplementary  
125 Information). In mouse, Notch signaling is required for *Mesp2* expression and the establishment  
126 of AP identities<sup>7,19</sup>. Accordingly, treatment of cultures with the Notch inhibitor DAPT prevented  
127 expression of *UNCX* and *MESP2* and rosette formation but not *PAX3* expression (Extended Data  
128 Fig.2b,c). In the presence of ROCKi or Blebbistatin, no rosette formed but YFP and mCherry-  
129 positive cells still appeared and aggregated into separate clusters (Fig.2d, Extended Data Fig.2d).  
130 *HES7*-null Somitoids showed similar *UNCX* expression and patterning as WT (Fig.2e, Extended  
131 Data Fig.2e). Further, *MESP2* deletion resulted in an expansion of *UNCX* positive cells and formed  
132 only rosettes exhibiting a posterior identity (Fig.2e, Extended Data Fig.2e), consistent with the

133 reported role of *MESP2* in inhibiting the posterior fate to promote the anterior one<sup>19</sup>. Therefore,  
134 human iPSCs differentiating to the somitic fate in this in vitro system acquire distinct AP  
135 identities. However, unlike embryos, these identities do not coexist within the same epithelial  
136 somite but are mostly found in distinct epithelial rosettes. These experiments argue that acquisition  
137 of the anterior and posterior fates operates independently of the segmentation clock and rosette  
138 morphogenesis.

139 How *MESP2* expression resolves from its initial wide segmental domain which marks the future  
140 somite to an anterior half-somite stripe defining the future anterior somite compartment is not  
141 understood. To see if our Somitoid system could help shed light on this process, we analyzed the  
142 dynamics of *MESP2* expression during AP patterning in vitro using the *MESP2* reporter line  
143 (Extended Data Fig.2a). The temporal profile of the reporter suggests a rapid activation of *MESP2*  
144 from ~64h to 72h (Fig. 2b). This phase is followed by a stabilization of the reporter expression in  
145 a salt-and-pepper pattern, spanning a 10-fold range of intensities (Fig.2f,g, Extended Data Fig.2f).  
146 These observations contrast with the established notion of an initial uniform *MESP2* expression in  
147 all cells of the future segmental domain<sup>1,2</sup>. Time lapse movies showed that, after 72h, cells  
148 progressively sorted together according to their *MESP2* expression levels defined by mCherry  
149 intensity. This led to the gradual formation of *MESP2*-high and *MESP2*-low clusters which  
150 eventually formed independent rosettes (Fig.2f,h, Extended Data Fig.2g, Supplementary Video5).  
151 To characterize this process, we measured the spatial auto-correlation of the mCherry (*MESP2*  
152 levels at 72h) and emerging YFP (*UNCX*) signals (Fig.2i, Extended Data Fig.2h,i). Before ~80h,  
153 the auto-correlation functions were merely decreasing, suggesting the absence of a periodic spatial  
154 pattern (Fig.2i). At ~80h, a trough formed at 90 microns and then quickly increased to 120 microns,  
155 suggesting a rapid formation of cell clusters. After ~84h, the spatial auto-correlation function  
156 retained a damped oscillator-like shape, as typical for periodic patterns<sup>20</sup>. The onset of the periodic  
157 pattern that precedes rosette formation also corresponds to a slowing down of cell motility which  
158 can be visualized by measuring their mean squared displacement (Fig.2j). Thus, from 72h to 120h,  
159 the salt-and-pepper mCherry distribution became organized into mCherry-high and low clusters  
160 and then mCherry-high and low rosettes without further *MESP2* expression (Extended Data Fig.2j).

161 To test the role of cell sorting, we dissociated and re-aggregated Somitoids at 72h when cells are  
162 still mesenchymal, and at 96h when epithelial rosettes start emerging (Fig.2k, Extended Data  
163 Fig.2j). Rosettes mostly formed with either high mCherry or high YFP-expressing cells appeared  
164 in re-aggregates from 72h (Fig.2l), while homogeneous rosettes containing mixed YFP- and  
165 mCherry-positive cells were formed in re-aggregates from 96h (Fig.2m). Thus, cell sorting before  
166 epithelialization plays an important role in AP patterning of Somitoids. To investigate when AP  
167 fates in individual cells are determined in this process, we separated the *MESP2*-high or *MESP2*-  
168 low fractions from cultures dissociated at 72h and re-aggregated them separately (Fig.2n). At 120h,  
169 similar rosette morphogenesis was observed in both type of aggregates with *MESP2*-low re-  
170 aggregates expressing significantly higher level of *UNCX* than *MESP2*-high re-aggregates  
171 (Fig.2o,p, Extended Data Fig.2k). This suggests that AP cell fates are largely determined before  
172 cell sorting and rosette formation. Altogether, our experiments show that an initial heterogeneity  
173 of *MESP2* expression levels is translated into defined compartments of anterior and posterior  
174 identity via an active cell sorting mechanism (Fig.2q).

175 To further test whether such a mechanism explains the AP polarization of somites, we next set out  
176 to establish an in vitro model reproducing the spatial features of somitogenesis, including PSM  
177 elongation and sequential formation and patterning of somites. We treated iPSCs with CHIR and

178 LDN for 24h, and then dissociated the cultures to single cells to generate spheroids using low  
179 adhesion wells (Fig.3a). We then embedded these spheroids into low-percentage Matrigel (10%)  
180 at 48h and cultured them in N2B27 media. By 96h, initially symmetric spheroids become  
181 elongated and develop into rod-shaped tissues exhibiting somite-like rosettes at one extremity  
182 (Fig.3b,c). Time lapse movies showed that these rosettes form sequentially starting from one end  
183 (which we define as anterior) while the other unsegmented end (the posterior end) kept extending  
184 (Extended Data Fig.3a,b, Supplementary Video6). The posterior end sometimes appeared  
185 bifurcated (Supplementary Video6). We termed these structures “Segmentoids”. Live imaging of  
186 a differentiating *PAX3-YFP* reporter line showed that *PAX3* expression initiated from the anterior  
187 end and propagated towards the posterior growing end accompanying rosette formation, indicating  
188 sequential maturation of the Segmentoids (Extended Data Fig.3c,d). TBXT/SOX2-positive cells  
189 were scattered in the spheroids at 48h (Fig.3d, Extended Data Fig.4). At 72h, TBXT/SOX2-  
190 positive cells congregated at the posterior end of the elongating Segmentoids, where they remained  
191 up to 96h. At 120h, we could barely detect TBXT while SOX2-only positive cells assembled into  
192 neural tube-like structures at the posterior tip of the tissue. These data suggest that the posterior  
193 growing end of the segmentoids resembles the tail bud end of embryos which contains the  
194 SOX2/TBXT positive Neuro-Mesodermal Progenitors (NMPs)<sup>21</sup>.

195  
196 We next used single-cell RNA sequencing (scRNAseq) to characterize the identity and  
197 developmental trajectory of Segmentoids cells. Using the 10X Chromium v3.1 platform, we  
198 sequenced a total of ~10,000 cells including iPSCs and Segmentoids at 24h, 48h, 72h, and 98h.  
199 When all time points were merged and analyzed together, cells on the UMAP spontaneously  
200 organized into a developmental trajectory reflecting the progression of somitogenesis (Fig.3e,f).  
201 Cells were clustered using the Leiden algorithm and the identity of clusters was defined based on  
202 differentially expressed genes. The clusters included iPSCs, NMPs (expressing *SOX2*, *TBXT*, and  
203 *NKX1.2*), Posterior PSM (expressing *MSGN1*, *TBX6*, and *HES7*), Anterior PSM (expressing  
204 *TCF15* and *MESP2*), and Somite (expressing *PAX3*, *UNCX*, and *TBX18*). A small Neural cluster  
205 (expressing *SOX2* and *PAX6*) was also observed. NMP and PSM populations gradually decreased  
206 with time while the somite population increased (Extended Data Fig.5a). Velocity combined with  
207 PAGA analysis confirmed that both Neural and Mesodermal cells arise from the NMP progenitors  
208 (Fig.3g, Extended Data Fig.5b,c). We also observed a collinear expression pattern of *HOX* genes  
209 which terminated at the level of the *HOX9* group by 98h (Extended Data Fig.6a). Altogether, we  
210 have established a 3D system in which differentiating human iPSC recapitulate the spatiotemporal  
211 progression of somitogenesis.

212  
213 We also performed a similar scRNAseq analysis of the Somitoids. We sequenced a total of ~10,000  
214 cells at 24h, 48h, 66h and 98h, and observed clusters similar to those of Segmentoids except for  
215 the neural cluster which was absent (Fig.3h,i). The activation of *HOX* gene clusters followed a  
216 similar temporal progression (Extended Data Fig.6b). In contrast to Segmentoids, cells from a  
217 defined time point could be ascribed to a single cluster (Fig.3h), indicating synchronized  
218 differentiation across the entire culture. We created a merged dataset containing all cells from the  
219 two systems. Cells from the two datasets with the same identity merged into one single cluster  
220 (Fig.3j,k), indicating that the cell types generated in the two systems are similar. Using density  
221 plots we showed that Somitoids time-points are clearly defined by a homogenous cell identity  
222 (Fig.3l). In contrast, the Segmentoid time points contain multiple differentiation stages (Fig.3l),  
223 recapitulating the progression of differentiation observed during somitogenesis in embryos. We

224 extracted the somite population from the merged dataset and investigated the onset of the anterior  
225 and posterior identities focusing on the expression of *TBX18* and *UNCX* (Fig.3m). We found that  
226 the expression of the two genes occurred at the somite stage and was mutually exclusive (0/76 in  
227 Somitoids and 9/757 in Segmentoids were double positive cells). Yet, these cells did not segregate  
228 into distinct clusters suggesting that they share a similar transcriptome at these stages despite their  
229 different AP identities. These analyses demonstrate that both systems can recapitulate  
230 somitogenesis in vitro with Somitoids showing synchronized cell differentiation while  
231 Segmentoids exhibit a spatially organized progressive maturation similar to that of the embryonic  
232 tissue (Fig.3n).

233  
234 We next investigated somite formation and patterning in Segmentoids, using a reporter cell line  
235 monitoring the expression dynamics of *HES7* (destabilized YFP), *MESP2* (mCherry) and *UNCX*  
236 (YFP) (Fig.4a-d, Extended Data Fig.7a). Oscillatory expression of *HES7* occurred in the posterior  
237 PSM and became down-regulated where *MESP2* expression started (Fig.4a,b, Supplementary  
238 Video7). The domain of *MESP2* expression progressed posteriorly in a staggered manner, closely  
239 in sync with *HES7* oscillations (Fig.4a,b). Time auto-correlation analysis shows oscillations with  
240 a period of  $4.6 \pm 0.1$  h for *HES7* and  $5.4 \pm 0.5$  h for *MESP2* (Fig.4d, Extended Data Fig.7b). Thus,  
241 the coupling between the segmentation clock and *MESP2* induction observed in mouse embryos<sup>22</sup>  
242 is recapitulated in Segmentoids. At 120h, alternating stripes of mCherry (*MESP2*) and YFP (*UNCX*)  
243 were observed (Fig.4c). From posterior to anterior, mCherry first appeared as a broad stripe  
244 followed by narrower bands with complementary YFP bands emerging (Fig. 4c), recapitulating  
245 the expression patterns observed in mouse in vivo. Patterning was independent of morphogenesis  
246 since mCherry/YFP stripes were established in the presence of ROCKi which blocked rosette  
247 formation (Extended Data Fig.7c).

248  
249 To investigate the role of the segmentation clock in somite polarity patterning<sup>23</sup>, we examined  
250 *HES7*-null Segmentoids. The YFP signal, reporting activity of the *HES7* promoter in absence of  
251 *HES7* protein (pseudo*HES7*), was confined to the posterior tip of the elongating tissue. It  
252 progressively shrank in a non-oscillatory pattern as the end grew (Fig.4e,f, Supplementary Video8).  
253 The onset of *MESP2* expression was still coordinated with the arrest of pseudo*HES7* in space. In  
254 contrast to its staggered progression in WT Segmentoids, the *MESP2* expression domain moved  
255 continuously towards the posterior end in the *HES7*-null mutants (Fig.4d,f). At 120h, no alternating  
256 stripes of mCherry (*MESP2*) or YFP (*UNCX*) could be observed in the mutant (Fig.4g). Cells of  
257 posterior and anterior identity appeared randomly distributed with some clusters formed,  
258 consistent with the segmental polarity defects reported in *HES7*-null mouse embryos<sup>24</sup>. To confirm  
259 this apparent disorganization in *HES7*-null Segmentoids, we used the nematic order parameter<sup>25</sup>  
260 of the *MESP2/UNCX* signal as a measure of anisotropy; we found that the nematic order parameter  
261 was lower in *HES7*-null Segmentoids than control during differentiation (Extended Data Fig. 7d).  
262 Thus, as with Somitoids, the segmentation clock is not required for the expression of AP identity  
263 genes in individual cells, but its output conferring rhythmicity to *MESP2* induction and segment  
264 determination appears to play an important role in the spatial organization of stripes of anterior  
265 and posterior identity in the forming somites.

266  
267 To explore whether the cell sorting mechanism observed in the Somitoids could be involved in the  
268 generation of alternate AP stripes, we analyzed the formation of individual segments in  
269 Segmentoids. We first observed a segment-wide transient expression of *MESP2* lasting for ~1

270 clock period followed by *UNCX* expression in *MESP2*-low cells during the next clock period  
271 (Fig.4h,i, Supplementary Video9). As with Somitoids, the initial induction of *MESP2* resulted in  
272 cells displaying a broad distribution of expression levels throughout the newly specified segment  
273 (Fig.4h). Cells of high *MESP2* expression levels gradually congregated to the anterior  
274 compartment while the overall mCherry intensity in the segment stayed constant (Fig.4j, Extended  
275 Data Fig.7e, Supplementary Video10), suggesting that no new *MESP2* expression occurred during  
276 segregation of the anterior and posterior domains. Spatial auto-correlation analysis following the  
277 same segment showed an emerging pattern of mCherry during this time window (Extended Data  
278 Fig.7f). Thus, this suggests that formation of the stripes of the anterior and posterior somitic  
279 compartments, does not rely on differential regulation of *MESP2* expression as usually inferred.  
280 To test whether such a heterogeneous *MESP2* expression is observed *in vivo*, we used the  
281 quantitative *in situ* Hybridization Chain Reaction (HCR), to examine the onset of *MESP2*  
282 expression in the anterior PSM of chicken and mouse embryos. Indeed, we observed a clear salt-  
283 and-pepper pattern of *MESP2* expression among cells of the future segmental domain indicating  
284 that the sorting mechanism that we uncovered *in vitro* is likely operating *in vivo* (Fig.4k,l,  
285 Extended Data Fig.7g,h).

286  
287 In summary, we established two iPSC-derived 3D models recapitulating human somitogenesis,  
288 Somitoids and Segmentoids (Fig.3n). In contrast to gastruloids or Trunk-Like Structures<sup>17,26,27</sup>  
289 which harbor cell lineages derived from the three germ layers, our two models contain almost  
290 exclusively paraxial mesoderm. Somitoids recapitulate the temporal sequence of somitogenesis,  
291 with all cells undergoing differentiation and morphogenesis in a synchronous manner. This system  
292 can provide unlimited amounts of cells precisely synchronized in their differentiation. It will allow  
293 exploring these patterning processes at an unprecedented level of detail. On the other hand,  
294 Segmentoids reconstruct the spatio-temporal features of somitogenesis, including gene expression  
295 dynamics, tissue elongation, sequential somite morphogenesis, and polarity patterning. They  
296 therefore provide an excellent proxy to study human somitogenesis.

297  
298 Together our work suggests a novel framework (Fig.4m) explaining how somite AP polarity is  
299 coordinated with segmental determination. We show that acquisition of somite AP identities in  
300 individual cells is established early in the nascent segmental domain in a salt-and-pepper fashion  
301 and does not require the segmentation clock, tissue elongation, or somite epithelialization *in vitro*.  
302 Our data suggest that two sequential processes are required for establishing somite AP polarity  
303 (Fig.4m): 1-the staggered initiation of *MESP2* expression in a salt and pepper fashion in defined  
304 segmental stripes specified by the segmentation clock; 2- the sorting of cells according to their  
305 *MESP2* expression levels to form the AP compartments of the future somite. This sorting  
306 mechanism identified *in vitro* appears to be conserved *in vivo*. The patterning mechanism ensuring  
307 that the *MESP2*-high compartment is anterior rather than posterior remains to be identified but  
308 could rely on the gradients of FGF/Wnt and RA along the PSM. Thus, our work exemplifies how  
309 the resolution offered by PSC-derived *in vitro* systems can be used to answer long-standing  
310 developmental biology questions.

- 311 1. Hubaud, A. & Pourquié, O. Signalling dynamics in vertebrate segmentation. *Nat. Rev. Mol.*  
312 *Cell Biol.* **15**, 709–721 (2014).
- 313 2. Saga, Y. The mechanism of somite formation in mice. *Curr. Opin. Genet. Dev.* **22**, 331–  
314 338 (2012).
- 315 3. Fleming, A., Kishida, M. G., Kimmel, C. B. & Keynes, R. J. Building the backbone: the  
316 development and evolution of vertebral patterning. *Development* **142**, 1733–1744 (2015).
- 317 4. Kuan, C.-Y. K., Tannahill, D., Cook, G. M. W. & Keynes, R. J. Somite polarity and  
318 segmental patterning of the peripheral nervous system. *Mech. Dev.* **121**, 1055–1068 (2004).
- 319 5. Oates, A. C., Morelli, L. G. & Ares, S. Patterning embryos with oscillations: structure,  
320 function and dynamics of the vertebrate segmentation clock. *Development* **139**, 625–639  
321 (2012).
- 322 6. Saga, Y., Hata, N., Koseki, H. & Taketo, M. M. *Mesp2*: a novel mouse gene expressed in  
323 the presegmented mesoderm and essential for segmentation initiation. *Genes Dev.* **11**,  
324 1827–1839 (1997).
- 325 7. Morimoto, M., Takahashi, Y., Endo, M. & Saga, Y. The *Mesp2* transcription factor  
326 establishes segmental borders by suppressing Notch activity. *Nature* **435**, 354–359 (2005).
- 327 8. Keynes, R. J. & Stern, C. D. Segmentation in the vertebrate nervous system. *Nature* **310**,  
328 786–789 (1984).
- 329 9. Schoenwolf, G. C., Bleyl, S. B., Brauer, P. R. & Francis-West, P. H. Larsen’s Human  
330 Embryology E-Book. (Elsevier Health Sciences, 2020).
- 331 10. Diaz-Cuadros, M. *et al.* In vitro characterization of the human segmentation clock. *Nature*  
332 (2020) doi:10.1038/s41586-019-1885-9.
- 333 11. Matsuda, M. *et al.* Recapitulating the human segmentation clock with pluripotent stem  
334 cells. *Nature* **580**, 124–129 (2020).
- 335 12. Chu, L.-F. *et al.* An In Vitro Human Segmentation Clock Model Derived from Embryonic  
336 Stem Cells. *Cell Rep.* **28**, 2247–2255.e5 (2019).
- 337 13. Chal, J. *et al.* Differentiation of pluripotent stem cells to muscle fiber to model Duchenne  
338 muscular dystrophy. *Nat. Biotechnol.* **33**, 962–969 (2015).
- 339 14. Matsumiya, M., Tomita, T., Yoshioka-Kobayashi, K., Isomura, A. & Kageyama, R. ES  
340 cell-derived presomitic mesoderm-like tissues for analysis of synchronized oscillations in  
341 the segmentation clock. *Development* **145**, (2018).
- 342 15. Chal, J. *et al.* Recapitulating early development of mouse musculoskeletal precursors of  
343 the paraxial mesoderm in vitro. *Development* **145**, (2018).
- 344 16. van den Brink, S. C. *et al.* Single-cell and spatial transcriptomics reveal somitogenesis in  
345 gastruloids. *Nature* (2020) doi:10.1038/s41586-020-2024-3.
- 346 17. Veenvliet, J. V. *et al.* Mouse embryonic stem cells self-organize into trunk-like structures  
347 with neural tube and somites. *Science* **370**, (2020).
- 348 18. Buckingham, M. & Relaix, F. The role of Pax genes in the development of tissues and  
349 organs: Pax3 and Pax7 regulate muscle progenitor cell functions. *Annu. Rev. Cell Dev. Biol.*  
350 **23**, 645–673 (2007).
- 351 19. Takahashi, Y. *et al.* *Mesp2* initiates somite segmentation through the Notch signalling  
352 pathway. *Nat. Genet.* **25**, 390–396 (2000).
- 353 20. Serini, G. *et al.* Modeling the early stages of vascular network assembly. *EMBO J.* **22**,  
354 1771–1779 (2003).
- 355 21. Gouti, M. *et al.* A Gene Regulatory Network Balances Neural and Mesoderm Specification  
356 during Vertebrate Trunk Development. *Dev. Cell* **41**, 243–261.e7 (2017).



- 357 22. Niwa, Y. *et al.* Different types of oscillations in Notch and Fgf signaling regulate the  
358 spatiotemporal periodicity of somitogenesis. *Genes Dev.* **25**, 1115–1120 (2011).
- 359 23. Dias, A. S., de Almeida, I., Belmonte, J. M., Glazier, J. A. & Stern, C. D. Somites Without  
360 a Clock. *Science* (2014).
- 361 24. Bessho, Y. *et al.* Dynamic expression and essential functions of Hes7 in somite  
362 segmentation. *Genes Dev.* **15**, 2642–2647 (2001).
- 363 25. Reymann, A.-C., Staniscia, F., Erzberger, A., Salbreux, G. & Grill, S. W. Cortical flow  
364 aligns actin filaments to form a furrow. *Elife* **5**, (2016).
- 365 26. Beccari, L. *et al.* Multi-axial self-organization properties of mouse embryonic stem cells  
366 into gastruloids. *Nature* **562**, 272–276 (2018).
- 367 27. Moris, N. *et al.* An in vitro model of early anteroposterior organization during human  
368 development. *Nature* (2020) doi:10.1038/s41586-020-2383-9.

369 **Acknowledgements**

370 We thank Sudhir Gopal Tattikota from N. Perrimon lab for help with scRNA sequencing experiments. We  
371 thank the Biopolymers Facility at Harvard Medical School for providing 10X Genomics Chromium  
372 Controller instrument access and sequencing consultation. We thank the NeuroTechnology Studio at  
373 Brigham and Women's Hospital for providing microscope access and consultation on data acquisition and  
374 data analysis. We thank the Harvard Neurobiology Imaging Facility for access to the FV1000 confocal  
375 microscope (NINDS P30 Core Center grant NS072030). We thank S. Megason for critical reading of the  
376 manuscript. Research in the Pourquié lab was funded by a grant from the National Institute of Health  
377 (5R01HD085121). Y.D. is supported by Fondation pour la Recherche Médicale (FRM)  
378 PLP2020100012456.

379

380 **Author contributions**

381 Y.M. designed, performed, and analyzed most biological experiments; Y.D. analyzed scRNA seq data; A.D.  
382 developed the codes and performed quantitative image analysis with S.D.; K.Z. performed RNA seq sample  
383 preparation and data analysis; A.S. and J.G.L. conducted embryo HCR experiments with help from L.S.;  
384 J.R. and O.A.T. contributed to scRNA experiments; A.S., A.M., P.R., and M.D.-C. contributed to data  
385 analysis or experiments. Y.M., Y.D., and O.P. wrote the manuscript with inputs from all authors; and O.P.  
386 supervised the study.

387

388 **Competing interests**

389 The authors declare the following competing interests: O.P. is scientific founder of Anagenesis  
390 Biotechnologies.

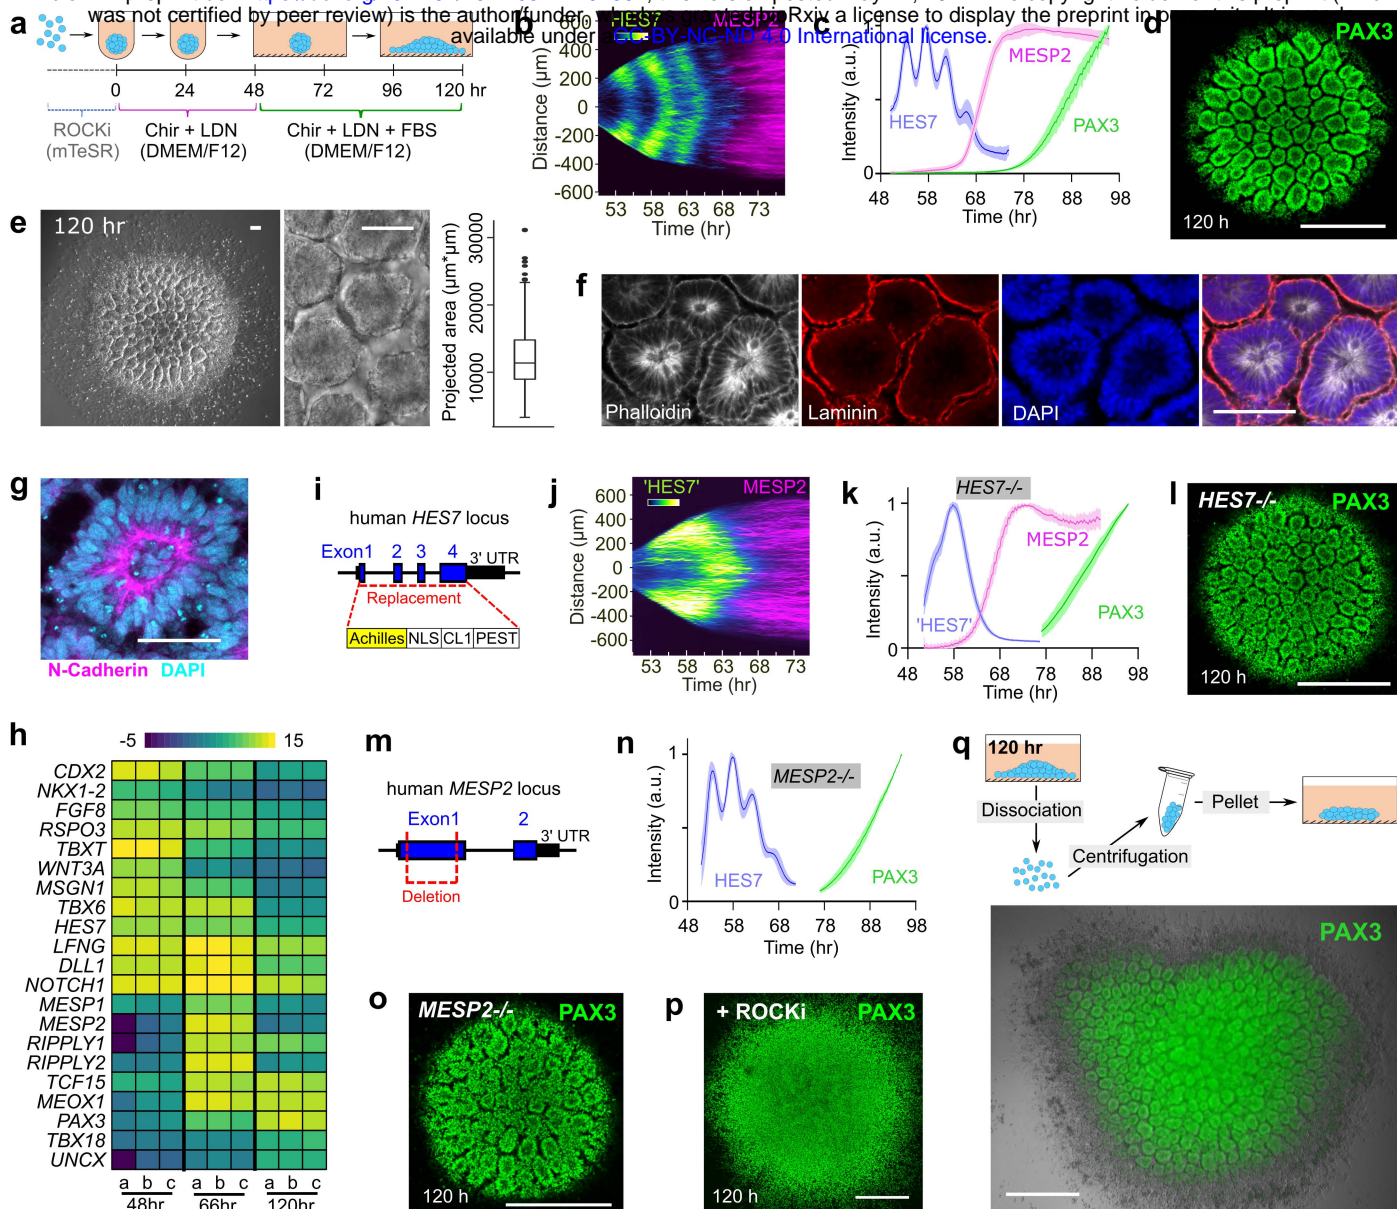

**Fig.1 Characterization of the Somitoid model.** **a**, Illustration of the Somitoid protocol. **b**, Kymograph of HES7 and MESP2 reporters obtained from a line scan across the center of a Somitoid. **c**, Temporal profiles (mean  $\pm$  s.d.) of reporters for HES7 (n=5 Somitoids), MESP2 (n=6 Somitoids), and PAX3 (n=6 Somitoids). **d**, Confocal image of a PAX3-reporting Somitoid at 120h. **e**, Bright field images of 120h Somitoid and box plot of rosette projected areas (n=310 rosettes from 5 Somitoids). **f-g**, Confocal images of immunostaining of 120h rosettes. **h**, Heat map of selected genes associated with somitogenesis in 48h, 66h, and 120h Somitoids (48 Somitoids in each time point; n=3 independent experiments), as measured by RNA sequencing. Expression levels were calculated by  $\log_2$  (TPM+0.01). **i**, Strategy for making HES7 knockout line. **j**, Kymograph of pseudoHES7 and MESP2 reporters in a HES7-null Somitoid. **k**, Temporal profiles (mean  $\pm$  s.d.) of reporters for pseudoHES7 (n=6 Somitoids), MESP2 (n=6 Somitoids), and PAX3 (n=9 Somitoids) in HES7-null Somitoids. **l**, Confocal image of a PAX3-reporting HES7-null Somitoid at 120h. **m**, Strategy for making MESP2 knockout line. **n**, Temporal profiles (mean  $\pm$  s.d.) of reporters for HES7 (n=6 Somitoids) and PAX3 (n=8 Somitoids) in MESP2-null Somitoids. **o**, Confocal image of a PAX3-reporting MESP2-null Somitoid at 120h. **p**, Confocal image of a PAX3-reporting WT Somitoid treated with 10  $\mu\text{M}$  ROCKi. **q**, Experiment scheme (top) and wide-field image (bottom) of re-aggregating 120h Somitoids. An overlay image of PAX3 reporter fluorescence and bright field is shown. Scale bars represent 500  $\mu\text{m}$  (d, l, o, p, q), 100  $\mu\text{m}$  (e, f), and 50  $\mu\text{m}$  (g).

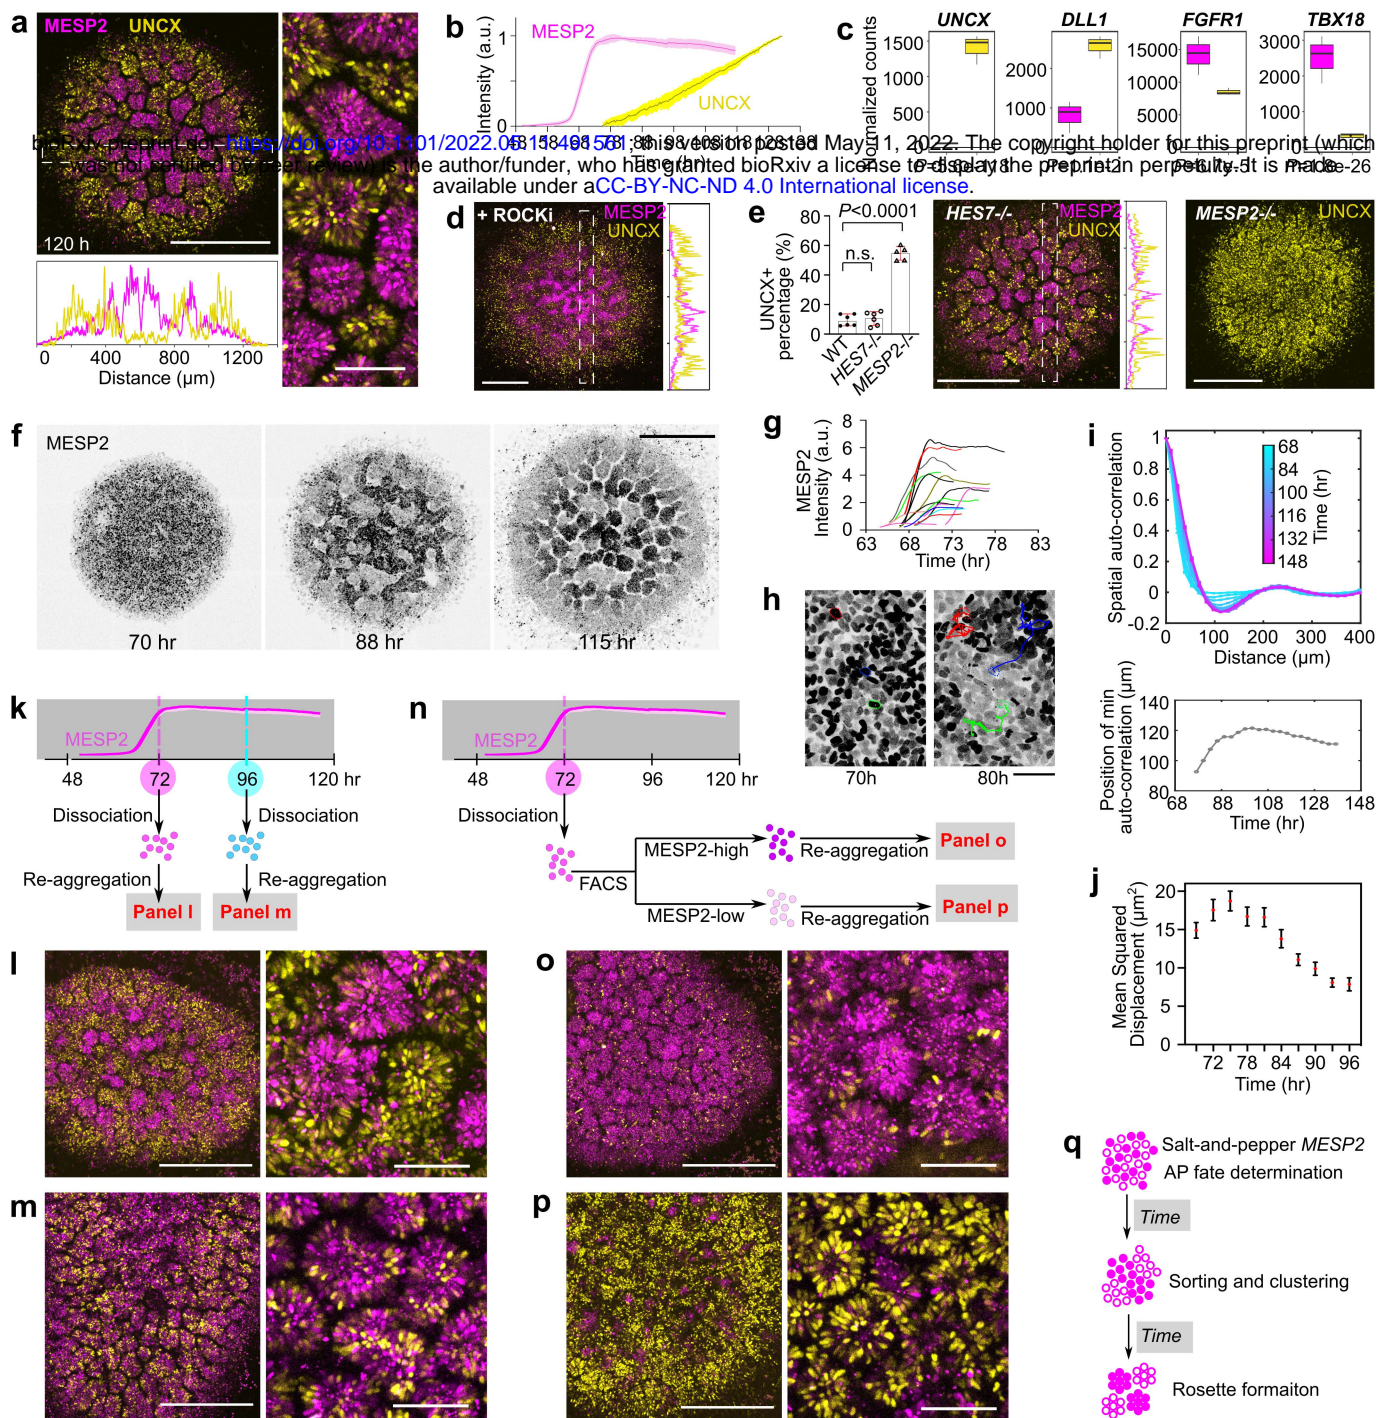

**Fig.2 Antero-Posterior polarity patterning in the Somitoid model.** **a**, Maximum z-projection images of reporters for MESP2 (magenta) and UNCX (yellow) in 120h Somitoids, and intensity profiles of MESP2 and UNCX across the dotted line box. **b**, Temporal profiles (mean±s.d.) of reporters for MESP2 (n=6 Somitoids) and UNCX (n=10 Somitoids) over the entire Somitoids. **c**, Normalized RNA counts of selected polarity genes in cell fractions separated by flow cytometry, as measured by RNA sequencing (n=3 independent experiments, 96 Somitoids in each n). Cells with top 10% mCherry fluorescence are shown on the left (magenta) and top 10% YFP fluorescence on the right (yellow). All four genes were identified as differentially expressed genes by DESeq2 using the Wald test. **d**, Image and Intensity plots of MESP2/UNCX reporters in a Somitoid treated with 10µM ROCKi. **e**, Left, percentage (mean±s.d.) of UNCX-positive cells characterized by flow cytometry in 120h WT (n=6 experiments), HES7-null (n=6 experiments), and MESP2-null (n=5 experiments) Somitoids, one-way ANOVA. Right, images of MESP2 and UNCX reporters in HES7-null Somitoids, and UNCX reporter in MESP2-null Somitoids. **f**, Time-lapse images of MESP2 reporter in a Somitoid. **g**, Temporal profiles of MESP2 reporter in individual cells. **h**, Images of MESP2 reporter in the same region. Tracks of MESP2-high cells are imposed on the 80h image with dotted outlines indicating cell positions at 70h. **i**, Top, spatial auto-correlation of MESP2-mCherry and UNCX-YFP signals in a Somitoid over time. Bottom, abscissa-position of the trough of the spatial auto-correlation function, indicating the typical cluster size, over time. **j**, Temporal plot (mean±95%CI) of mean squared displacement (n=3422 tracks from 2 Somitoids). **k-m**, Experiment scheme (k) and maximum-z-projection images (l, m) of re-aggregating MESP2/UNCX reporting Somitoids at 72h (l) or 96h (m). **n-p**, Experiment scheme (n) and maximum-z-projection images (o, p). After dissociation of 72h Somitoids, MESP2-high (top 10% mCherry) and MESP2-low (bottom 10% mCherry) single cells were separated by flow cytometry and re-aggregated. **q**, Illustration of AP polarity patterning in the Somitoid. Solid circles represent MESP2-high cells and hollow circles represent MESP2-low cells. Scale bars represent 50µm (h); 500µm (d, e, f); 500µm and 100µm in corresponding enlarged views (a, l, m, o, p).

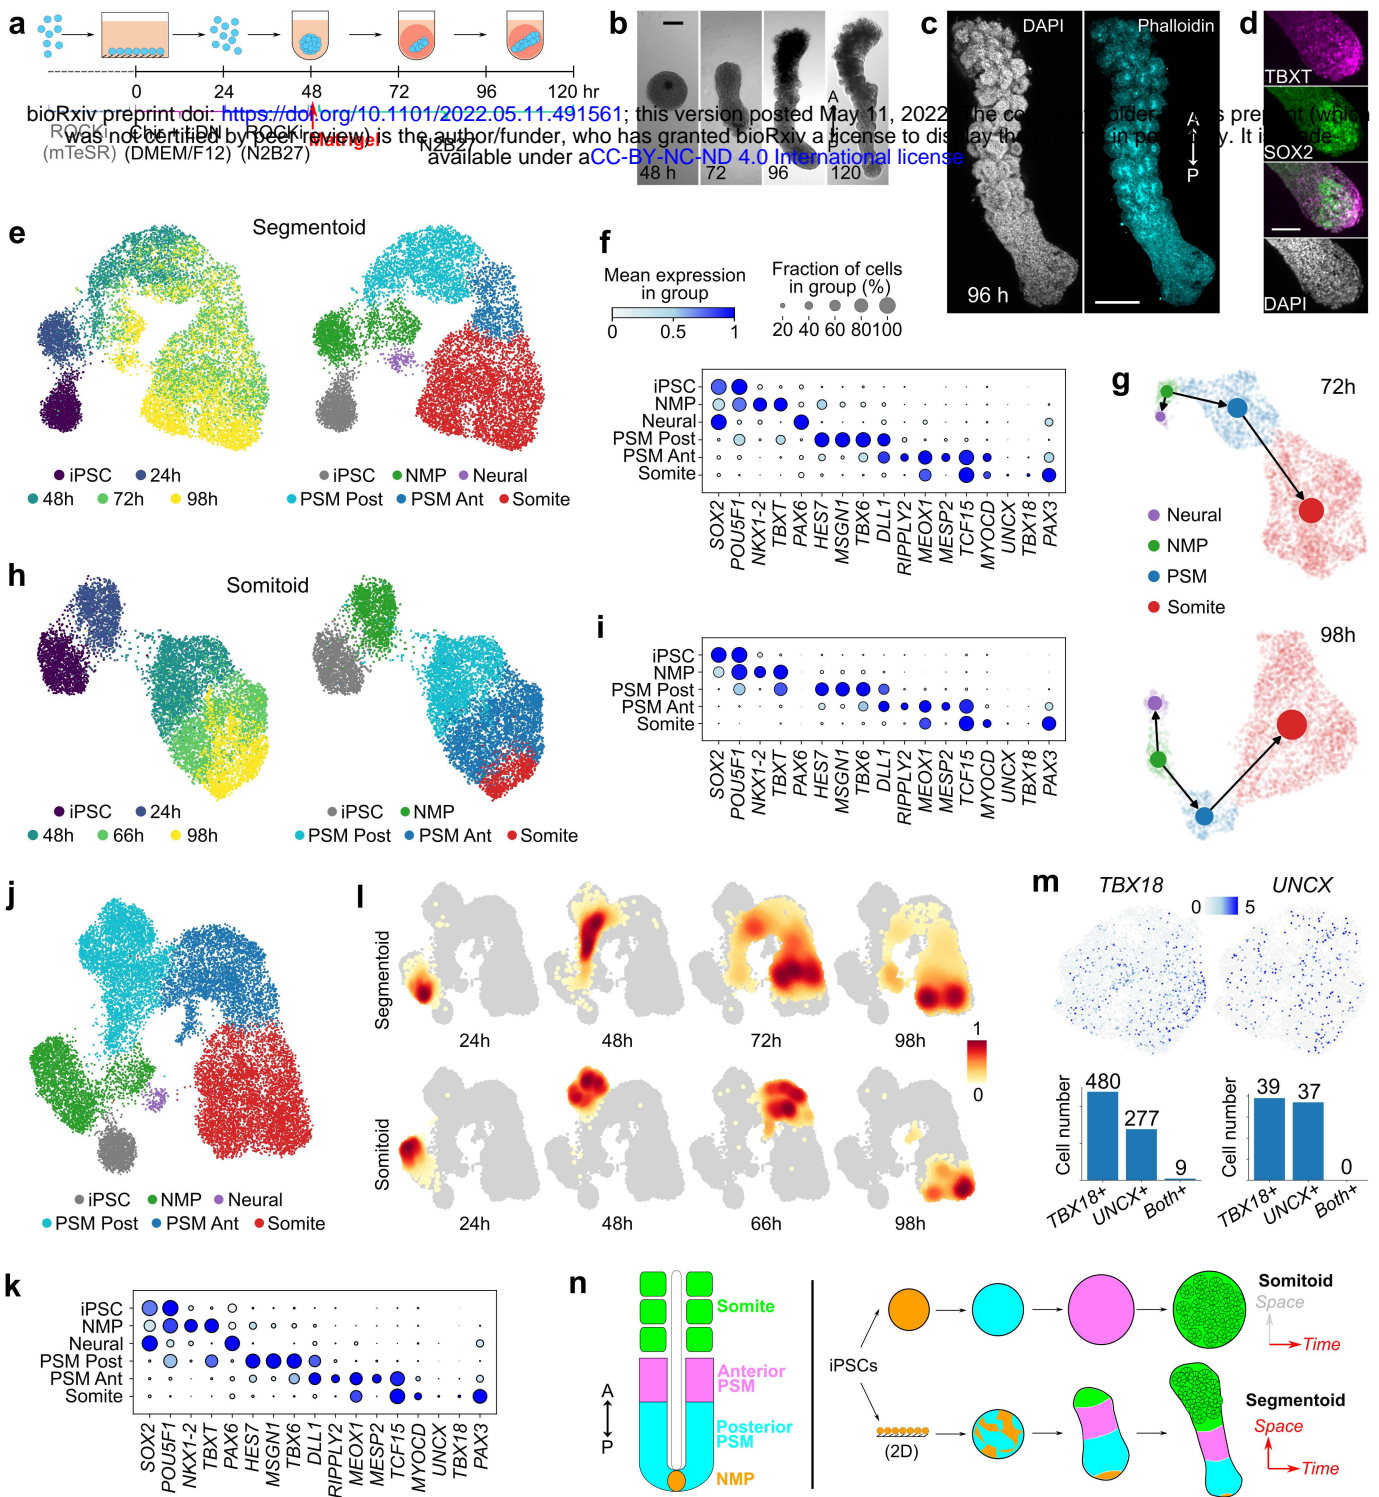

**Fig.3 single-cell RNAseq characterization of the Segmentoid and Somitoid models.** **a**, Illustration of the Segmentoid protocol. **b**, Representative bright field images of the Segmentoids at various time points. A, anterior; P, posterior. **c**, Maximum z-projection images of a 96h Segmentoid. **d**, Confocal images of the posterior tip of a 96h Segmentoid immunostained with TBXT and SOX2. **e**, UMAP embedding (10,861 cells) colored with Segmentoid timepoints (left) and cell types (right) identified with Leiden clustering. iPSC, 1491 cells; 24h, 1066 cells; 48h, 1577 cells from 76 Segmentoids; 72h, 3539 cells from 64 Segmentoids; 98h, 3188 cells from 32 Segmentoids. **f**, Dot plot of selected signature genes in cell type clusters from Segmentoids. The mean expression of each cluster is scaled per gene. **g**, PAGA graphs with velocity-directed edges in 72h (top) and 98h (bottom) Segmentoids. **h**, UMAP embedding (8,690 cells) colored with Somitoid timepoints (left) and cell types (right) following Leiden clustering. iPSC, 1491 cells; 24h, 1265 cells from 96 Somitoids; 48h, 2335 cells from 96 Somitoids; 66h, 2246 cells from 80 Somitoids; 98h, 1353 cells from 48 Somitoids. **i**, Dot plot of selected genes in cell type clusters from Somitoids. **j**, UMAP embedding of cells merged from both models (19,551 cells) colored with cell types identified with Leiden clustering. **k**, Dot plot of selected genes in cell type clusters from both models. **l**, Heatmap of cell density in UMAP embedding (scaled per timepoint). **m**, Top, somite sub-cluster highlighting cells expressing TBX18 (left) and UNCX (right); Bottom, number of cells expressing TBX18, UNCX, or both in Segmentoids (left) and Somitoids (right). **n**, comparison of the embryo with the two in vitro models. Each cell type is represented by the same color. Scale bars represent 200 $\mu$ m (b, c) and 100 $\mu$ m (d).

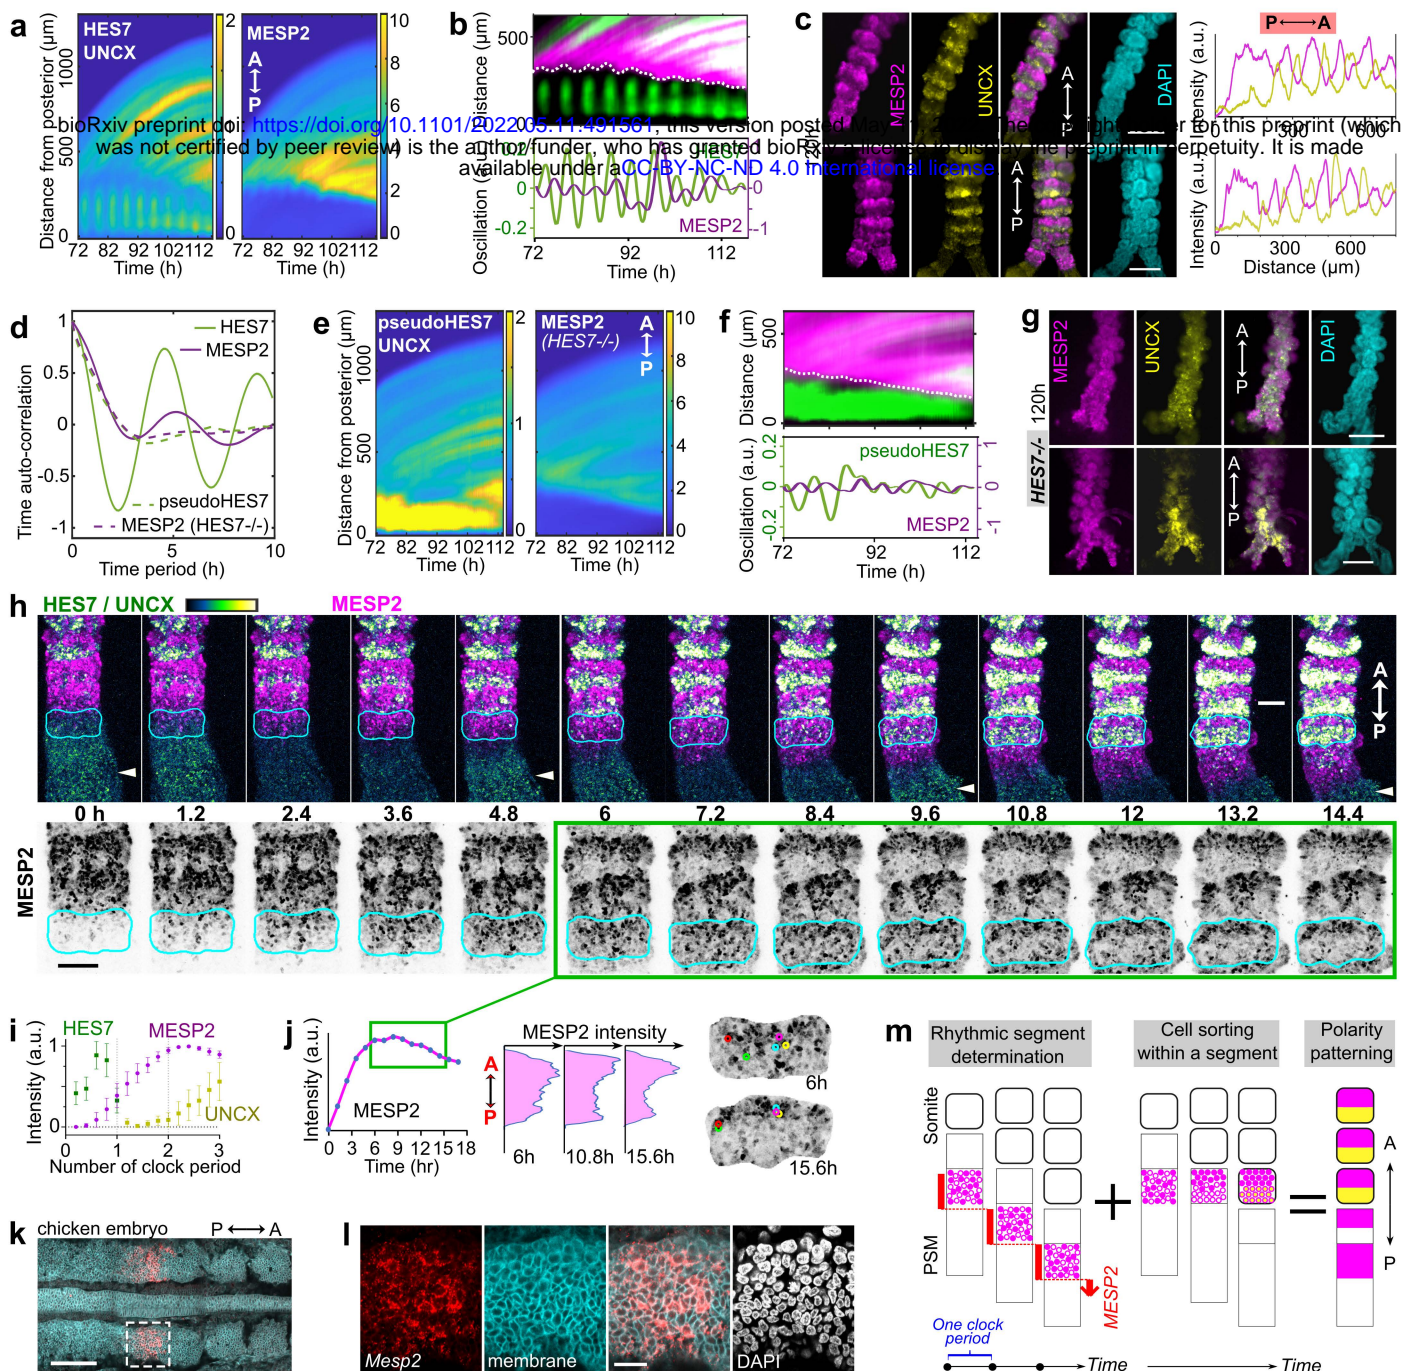

**Fig.4 Formation of anterior and posterior somite compartments in Segmentoids.** **a**, Kymographs of reporters for HES7 (posterior part in the kymograph), UNCX, and MESP2 in the same Segmentoid. Segmentoids are aligned to the posterior tip at each time point. **b**, Top, merged kymographs of HES7/UNCX (green) and MESP2 (magenta). Dotted line highlights the start of the MESP2 signal region. Bottom, HES7 and MESP2 oscillations (Methods). **c**, Wide-field images (left) of 120h MESP2/UNCX-reporting Segmentoids and intensity profiles (right) from posterior (P) to anterior (A) end along each Segmentoid. **d**, Average time auto-correlation of HES7 and MESP2 reporter oscillations in WT (n=7 Segmentoids) and HES7-null (n=6 Segmentoids). The first peak of the auto-correlation function (time>0h) indicates the oscillation period. **e**, Kymographs of reporters for pseudoHES7, UNCX, and MESP2 in the same HES7-null Segmentoid. **f**, Top, merged kymographs of pseudoHES7/UNCX (green) and MESP2 (magenta) in a HES7-null Segmentoid. Dotted line highlights the start of the MESP2 signal region. Bottom, pseudoHES7 and MESP2 oscillations (Methods). **g**, Wide-field images of 120h MESP2/UNCX-reporting HES7-null Segmentoids. **h**, Time-lapse, maximum-z-projection confocal images of MESP2 and UNCX/HES7 reporters (top) and enlarged grey-scale images of MESP2 (bottom) in a Segmentoid. Cyan solid outlines indicate the same forming segment and white arrowheads indicate the approximate peaks of HES7 oscillation. **i**, Reporter dynamics (mean±s.d.) in forming segments aligned according to phases of HES7 oscillation (n=6 segments in 2 Segmentoids). **j**, Left, temporal profile of MESP2 intensity in the forming segment outlined in h. Green solid-line boxes indicate the corresponding time points. Middle, MESP2 profiles along a line scan of the AP axis of the same segment. Right, isolated segments with circles of the same color indicating the same cells. **k**, Merged confocal image of a chicken embryo stained with MESP2 HCR probe (red) and a membrane dye (cyan). **l**, Enlarged view of the region indicated by the dotted-line box in k. **m**, Model illustration: The stepwise, salt-and-pepper induction of MESP2 expression organized by the segmentation clock defines a maturing region at the anterior PSM; Cell sorting within this forming segment rearranges MESP2-high cells to the anterior compartment while MESP2-low cells to the posterior, which further express differential genes to achieve AP polarity patterning. Scale bars represent 200µm (c, g), 100µm (h, k) and 20µm (l).

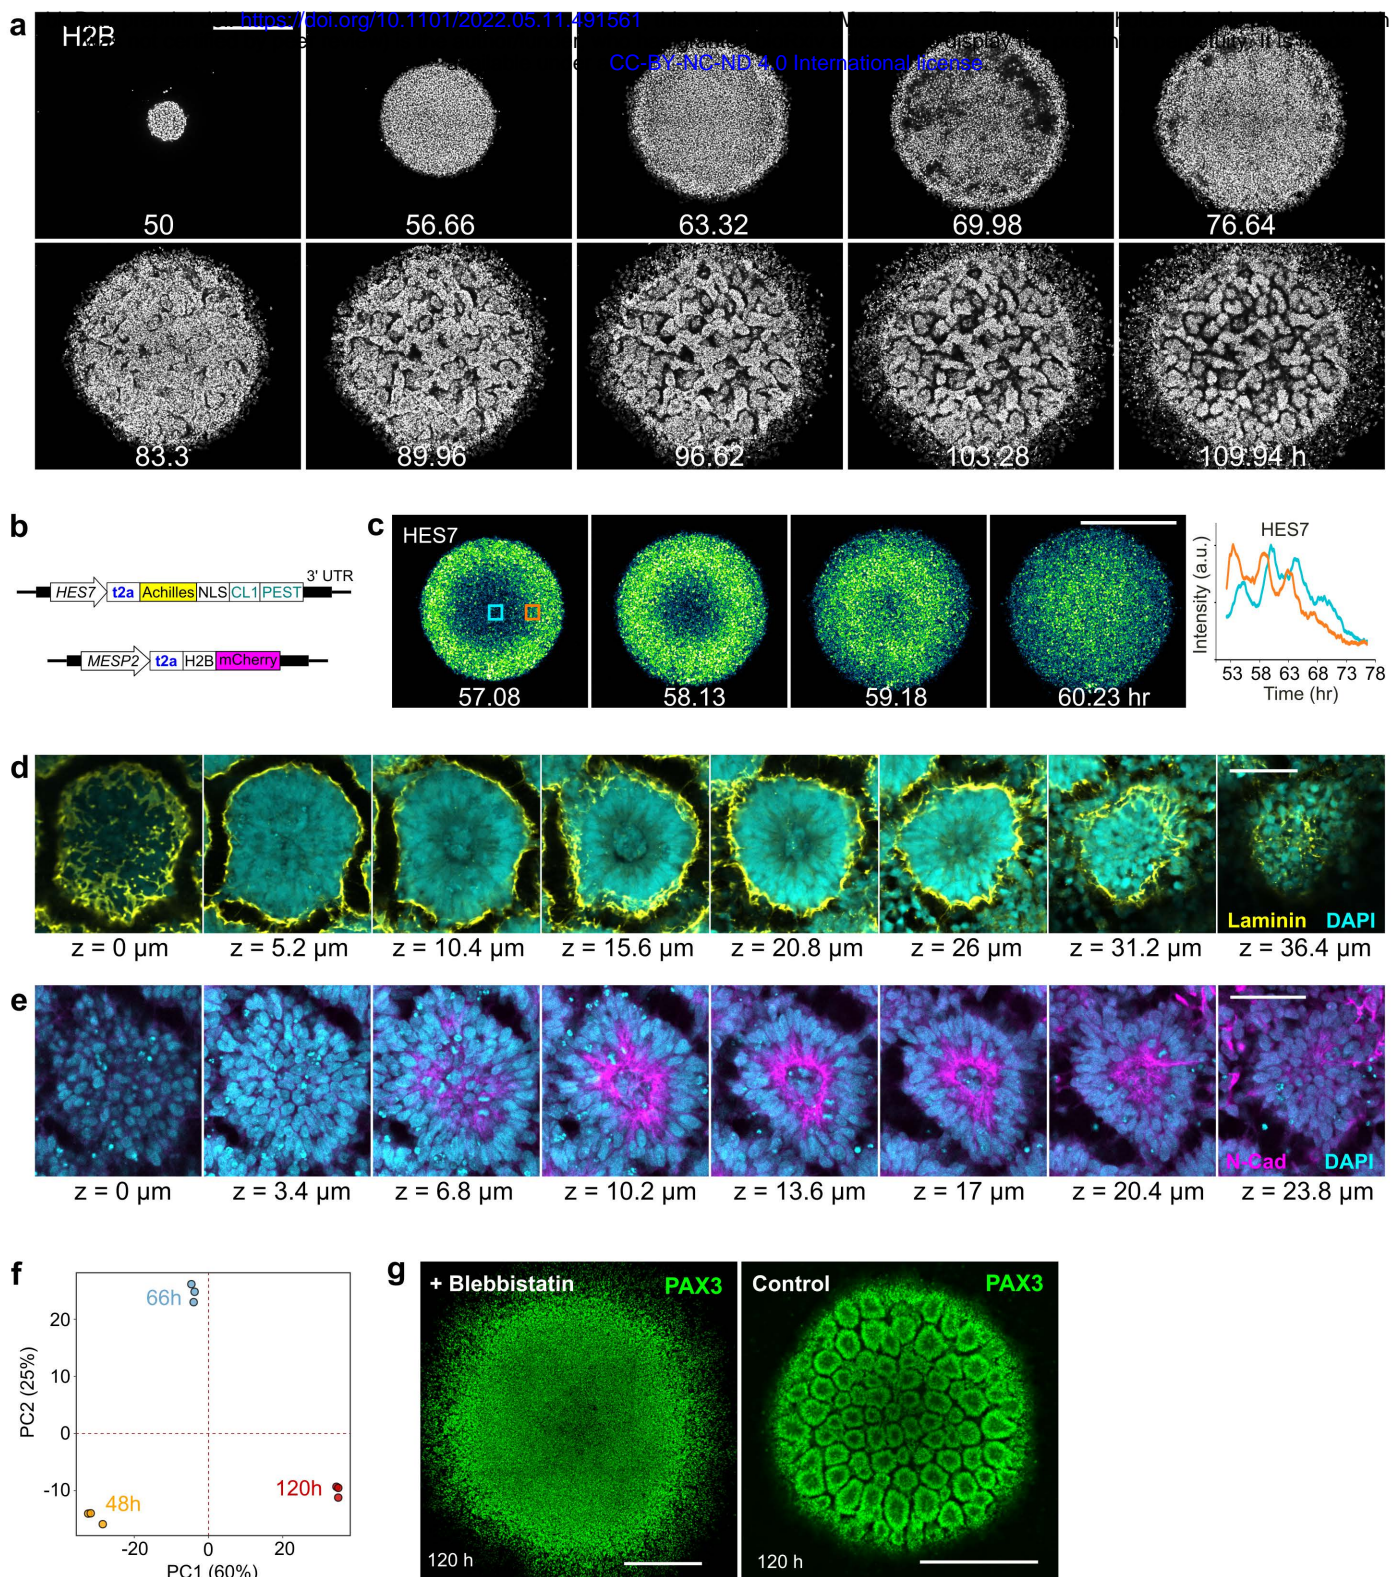

**Extended Data Fig.1 Characterization of Somatoids.** **a**, Time-lapse confocal images of H2B-mCherry in a spreading Somatoid. **b**, Illustration of the design of the HES7/MESP2 double-reporter cell line. **c**, Left, time-lapse confocal images of HES7 wave; Right, temporal profiles of HES7 reporter in two different regions indicated by the blue and orange boxes. **d**, **e**, Confocal slices from the bottom ( $z=0 \mu\text{m}$ ) to the top of a rosette in 120h Somatoid stained with Laminin (**d**) and N-Cadherin (**e**). **f**, Principal components analysis using the same RNA sequencing datasets shown in Fig. 1h. **g**, Confocal images of 120h PAX3-reporting Somatoids treated with  $5 \mu\text{M}$  Blebbistatin (left) and control (right). Scale bars represent  $500 \mu\text{m}$  (**a**, **c**, **g**) and  $50 \mu\text{m}$  (**d**, **e**).

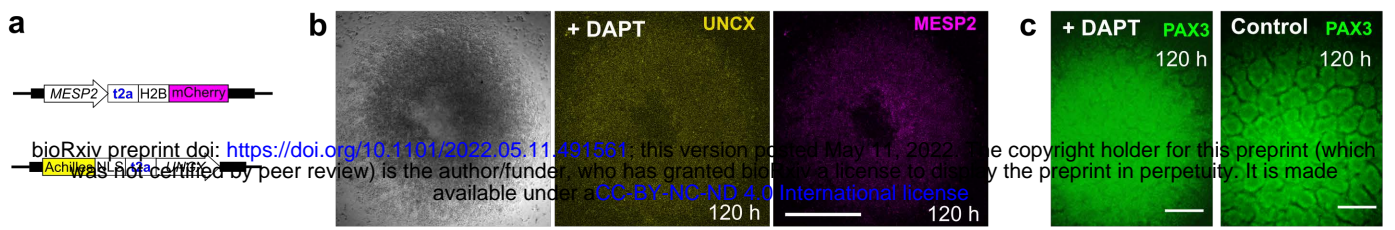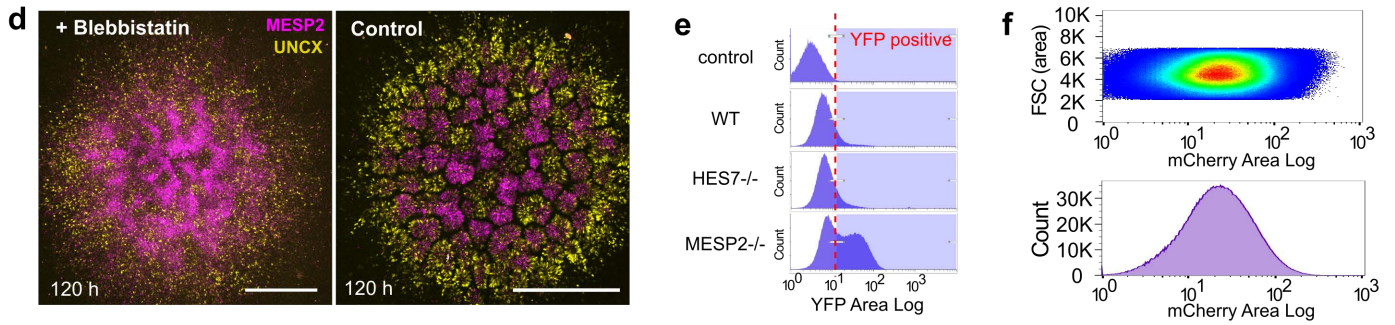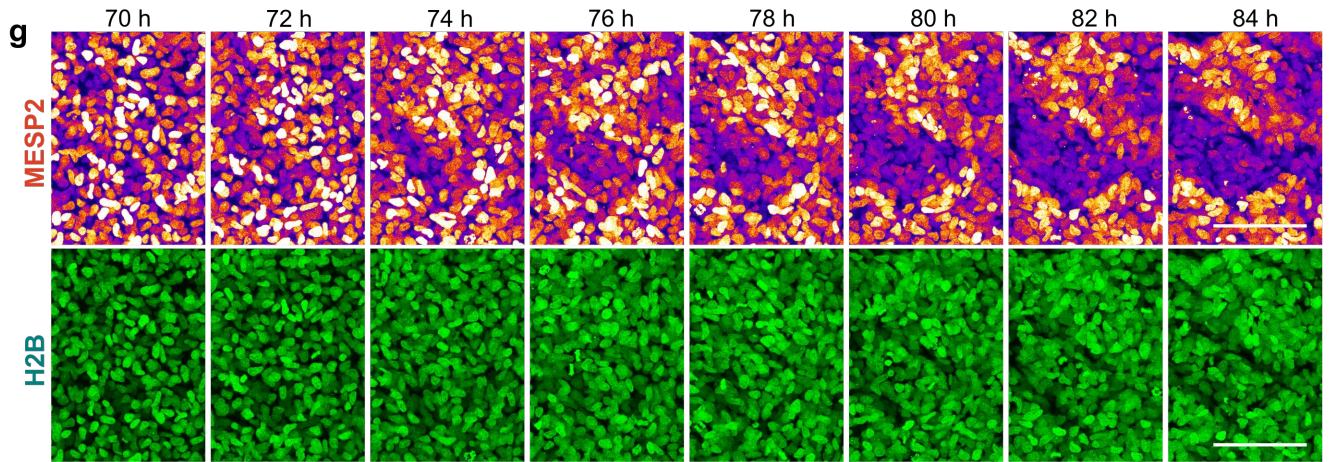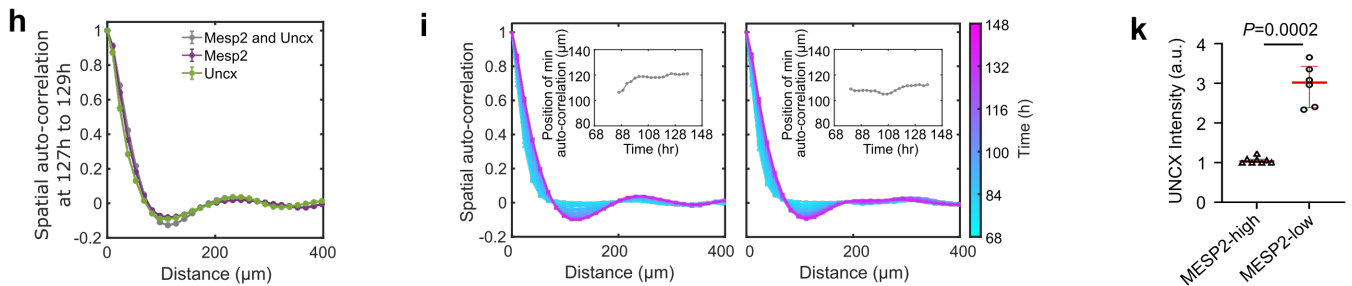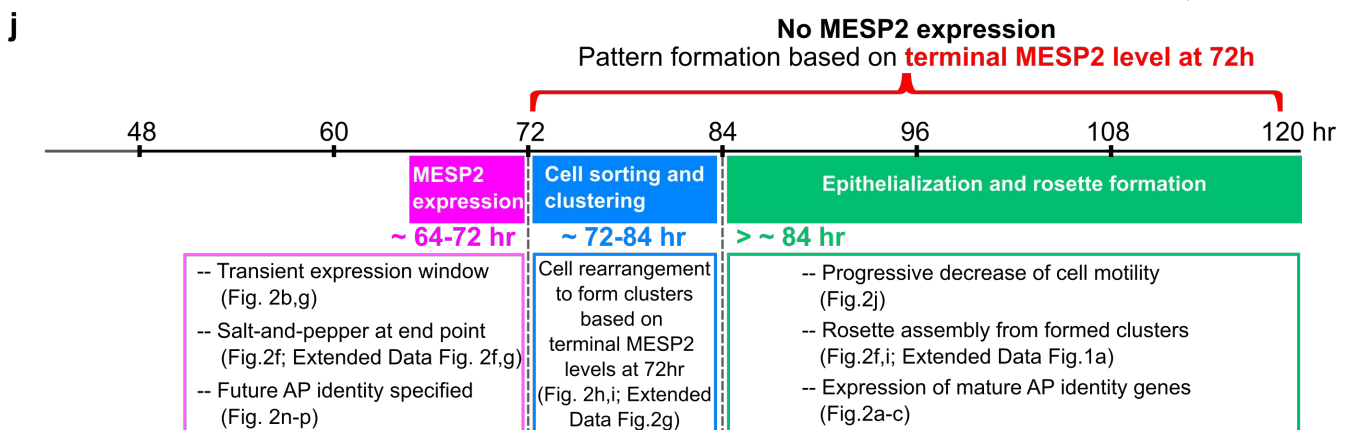

**Extended Data Fig.2 Antero-Posterior patterning in Somitoids.** **a**, Illustration of the design of the MESP2 and UNCX reporters. **b**, Images of an UNCX and MESP2 reporting Somitoid treated with 50µM DAPT. **c**, Wide-field images of PAX3-reporting Somitoids treated with 50µM DAPT (left) and control (right). **d**, Maximum-z-projection confocal images of UNCX and MESP2 reporting Somitoids treated with 5µM Blebbistatin (left) and control (right). **e**, Histograms of flow cytometry analysis of UNCX-YFP in 120h Somitoids (control, WT, HES7-null, and MESP2-null cell lines) with debris and doublets removed. Control is the parental NCRM1 cell line. Fractions on the right side of the red dotted line in the histograms are defined as YFP-positive. **f**, Scattered plot (top) and histogram (bottom) of flow cytometry analysis on MESP2-mCherry Somitoids at 72h with debris and doublets removed. **g**, Time-lapse maximum-z-projection confocal images of MESP2 reporter (top) and H2B-GFP (bottom) in the same region of a Somitoid. **h**, Spatial auto-correlation (sole MESP2 signal, sole UNCX signal or them combined together) once rosettes are formed (representative example from n=3 Somitoids). **i**, Additional examples of spatial auto-correlation analysis and abscissa-position of the auto-correlation trough (inset) of MESP2/UNCX double reporting Somitoid over time. **j**, Summary of MESP2 expression and pattern formation processes in the timeline of the Somitoid differentiation. **k**, Quantification of UNCX reporter in MESP2-high (n=8 re-aggregates from 3 experiments) and MESP2-low (n=6 re-aggregates from 3 experiments) re-aggregates in Fig.2n-p, paired two-tailed t-test. Scale bars represent 500µm (b, d), 200µm (c), and 100µm (g).



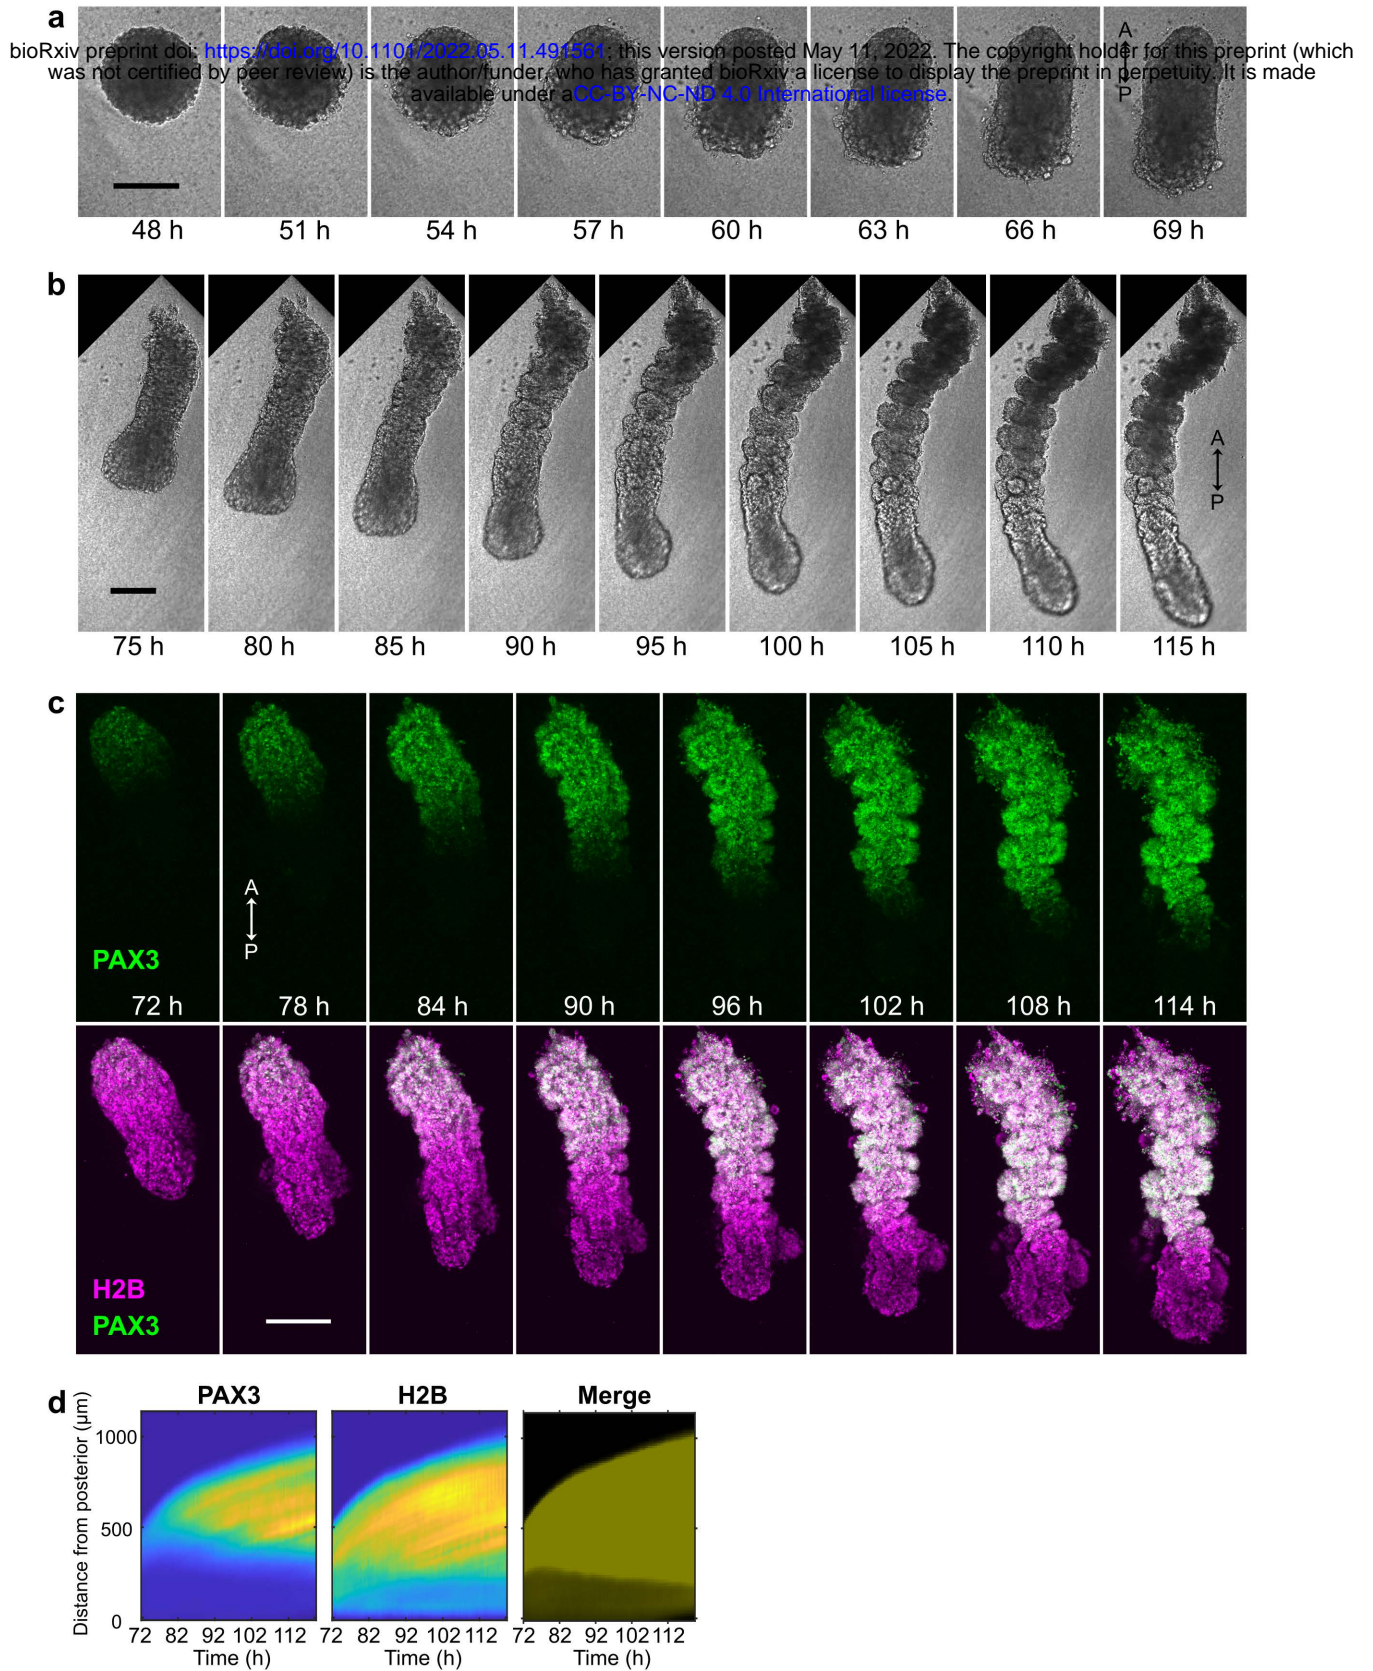

### Extended Data Fig.3 The Segmentoid model.

**a, b**, Time-lapse bright field images of the

Segmentoid model. A, anterior; P, posterior. **c**, Time-lapse maximum-z-projection confocal images of PAX3-YFP reporter (top) and PAX3-YFP merged with H2B-mCherry (bottom) in a Segmentoid. **d**, Kymographs of PAX3 reporter (left), H2B (middle), and merged channels (right) in the same Segmentoid. Segmentoids are aligned to the posterior tip at each time point. All scale bars represent 200 $\mu\text{m}$ .

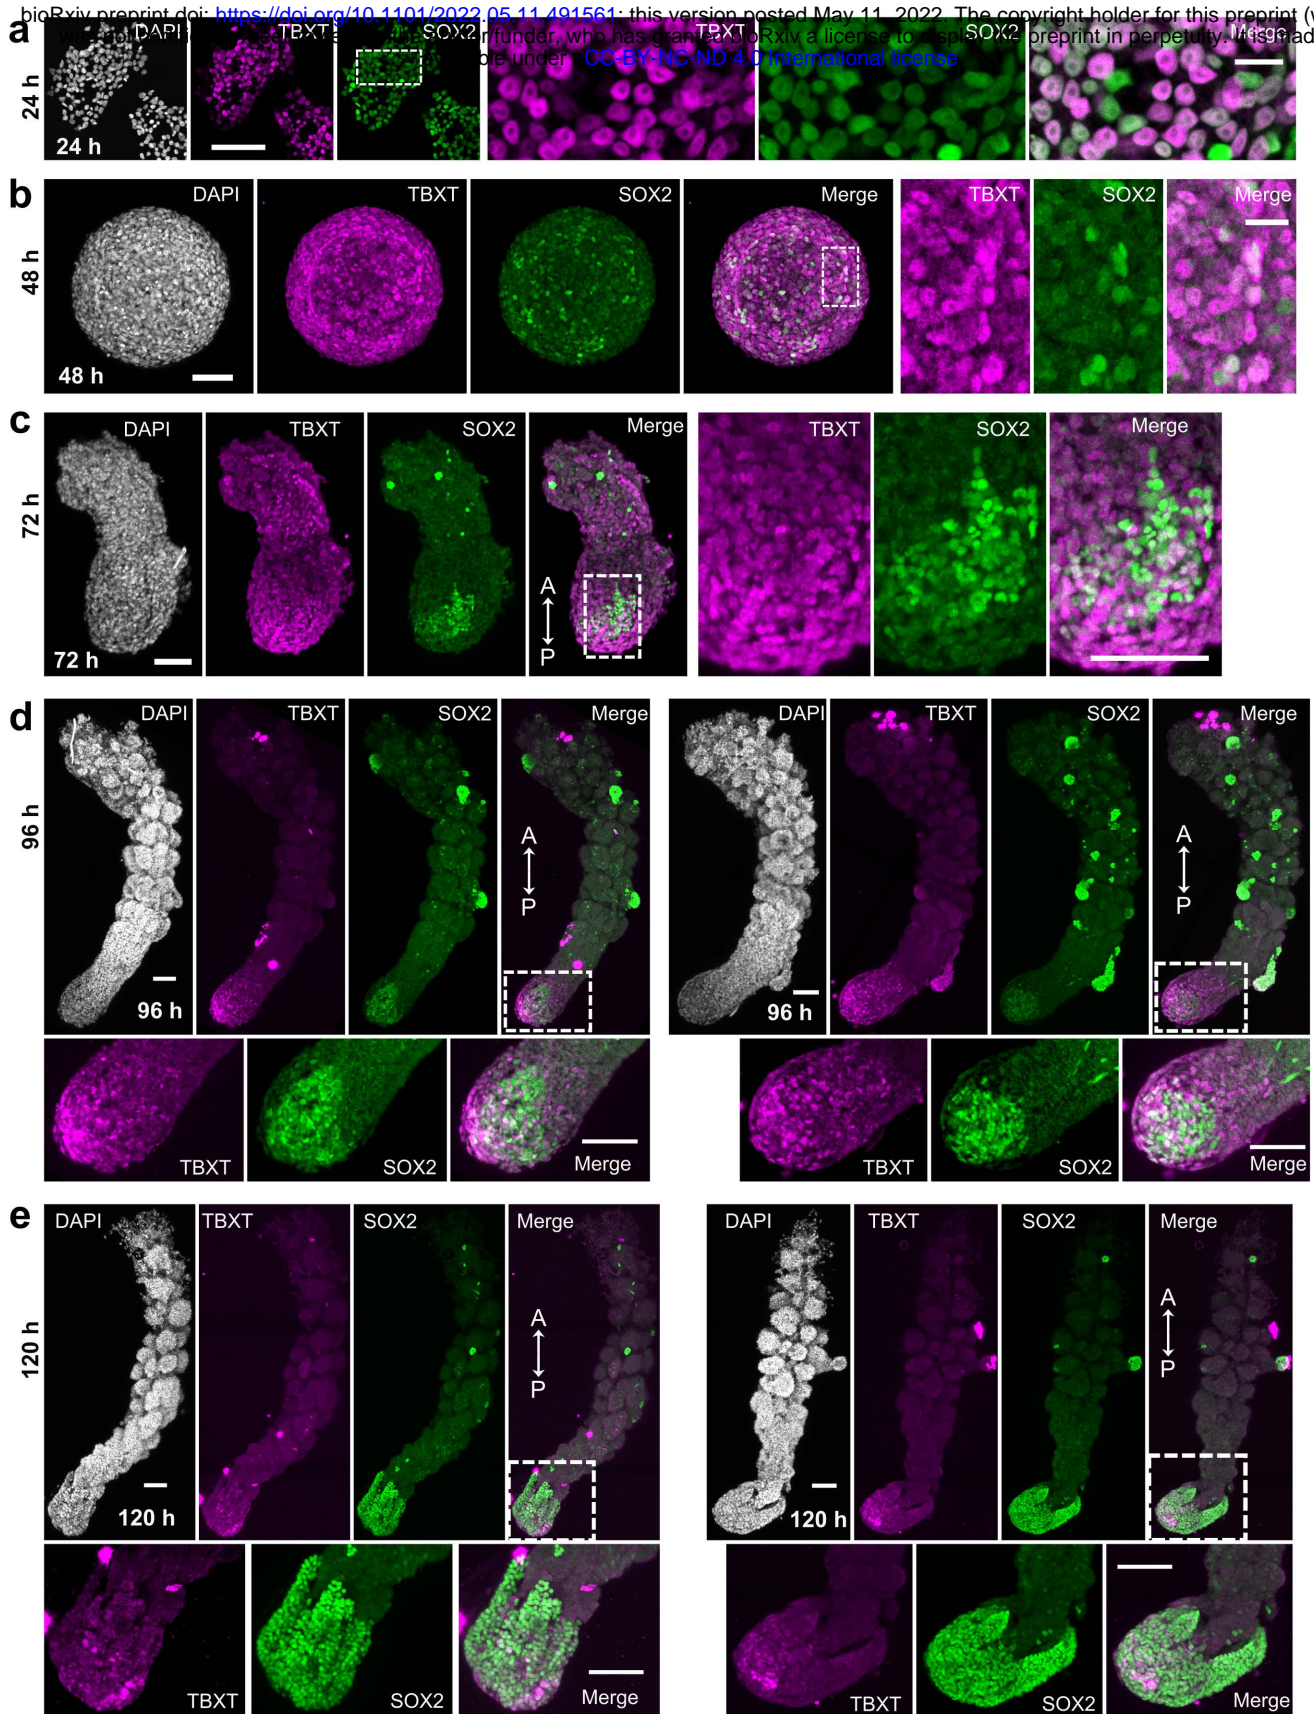

#### Extended Data Fig.4 Expression of TBXT and SOX2 in Segmentoids.

Confocal images of immunostaining of TBXT and SOX2 at 24h (a), 48h (b), 72h (c), 96h (d), and 120h (e) of the Segmentoid model. Maximum-z-projection images are shown from b-e. A, anterior; P, posterior. Scale bars (a, b) represent 100 $\mu$ m and 20 $\mu$ m in corresponding enlarged views; Scale bars (c, d, e) represent 100 $\mu$ m.

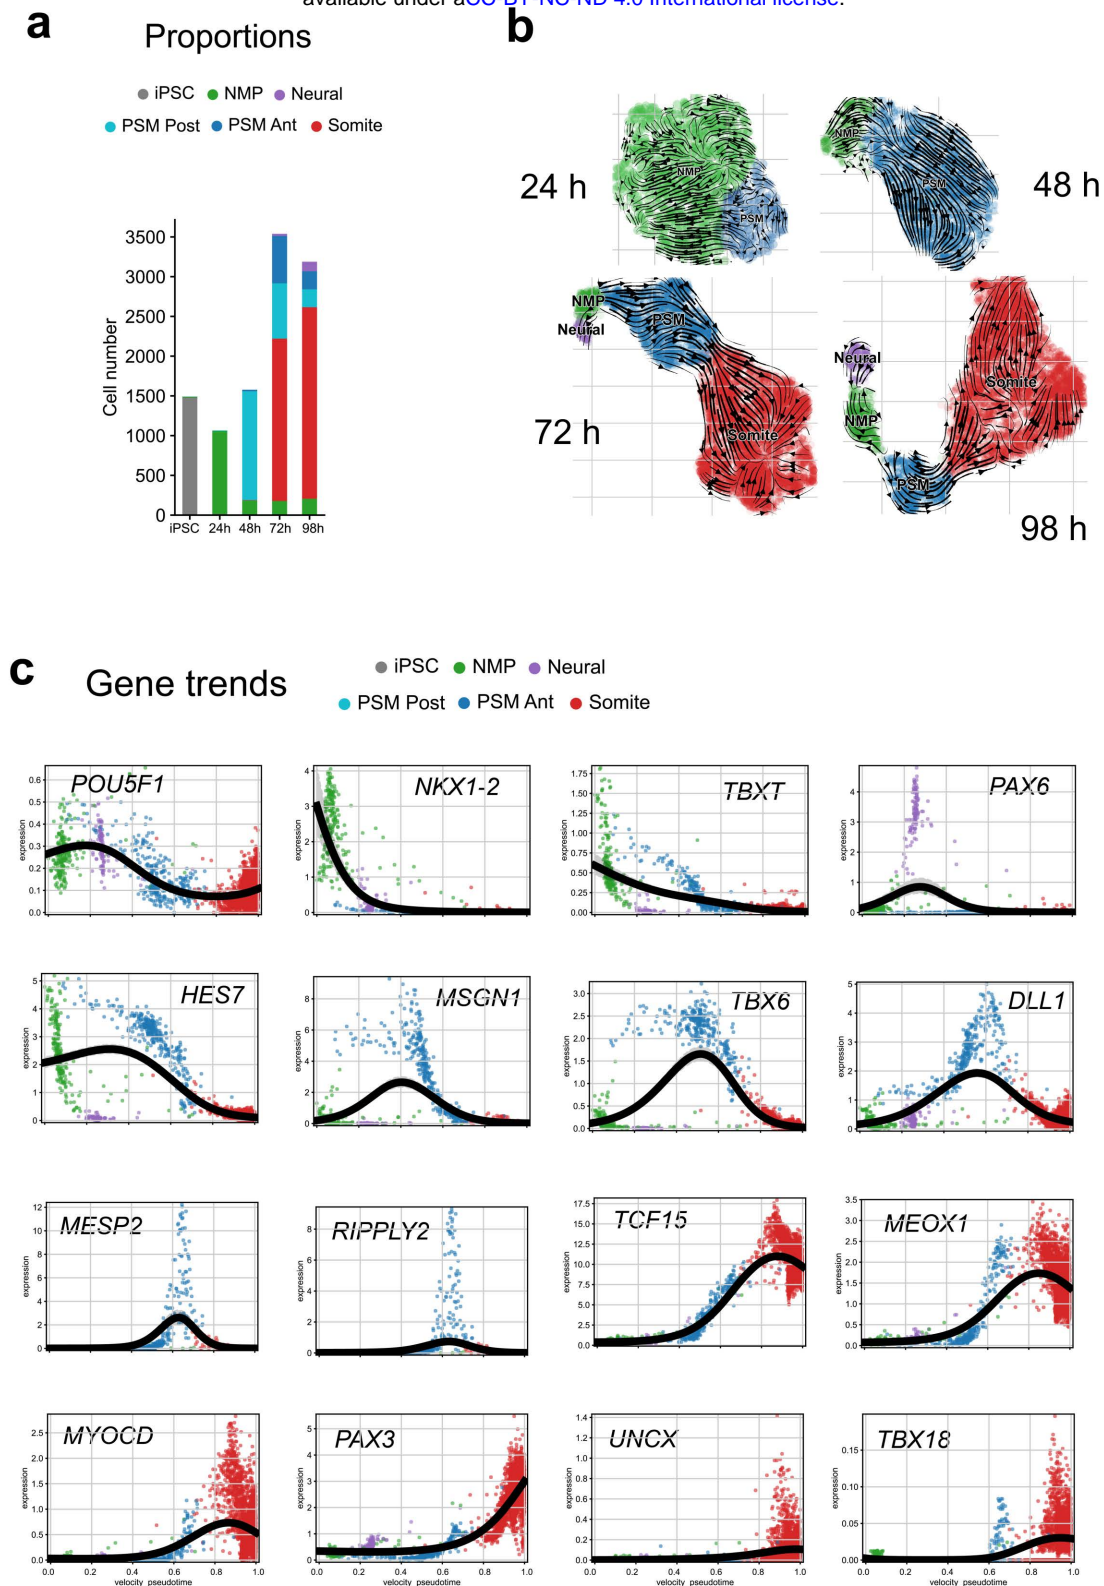

### Extended Data Fig.5 Single-cell RNAseq of the Segmentoid model.

**a**, Proportion of cell types identified with Leiden clustering at different timepoints of the Segmentoid model. **b**, Stream plots of velocities on the UMAP after correction for differential kinetics recapitulating trajectory of cell types at various timepoints. **c**, Signature gene expression trends (Log2/Normalized) toward somite as the specific terminal population.

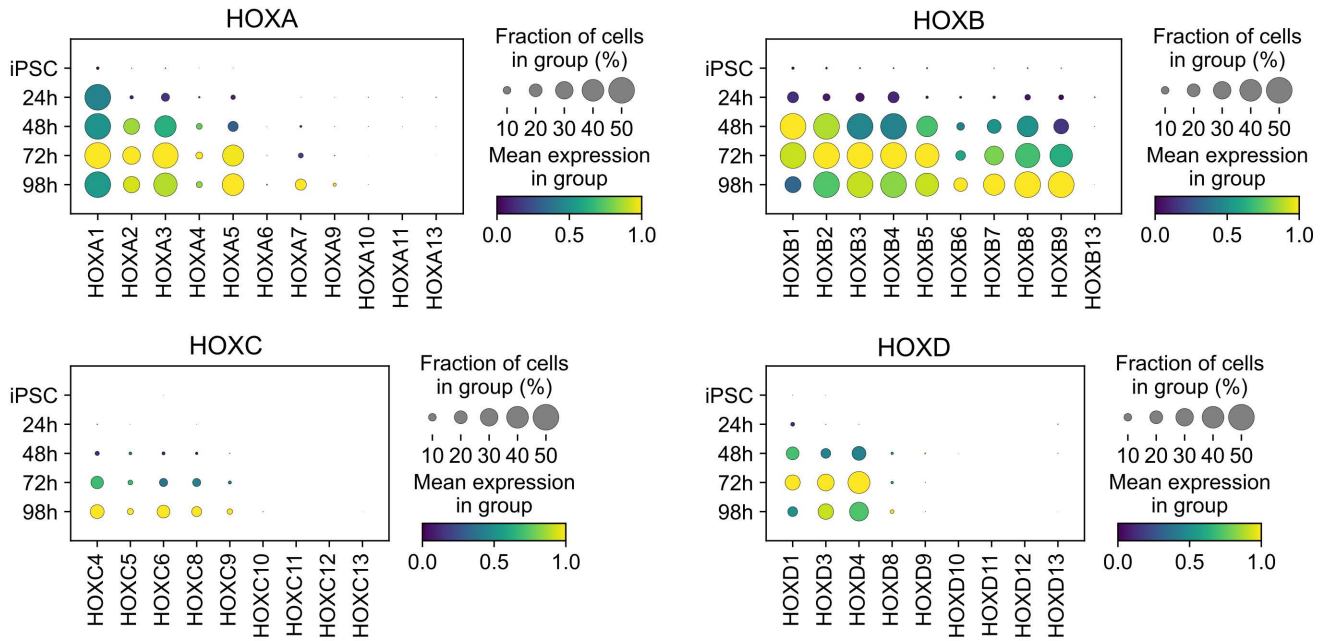

**b** **Somitoid**

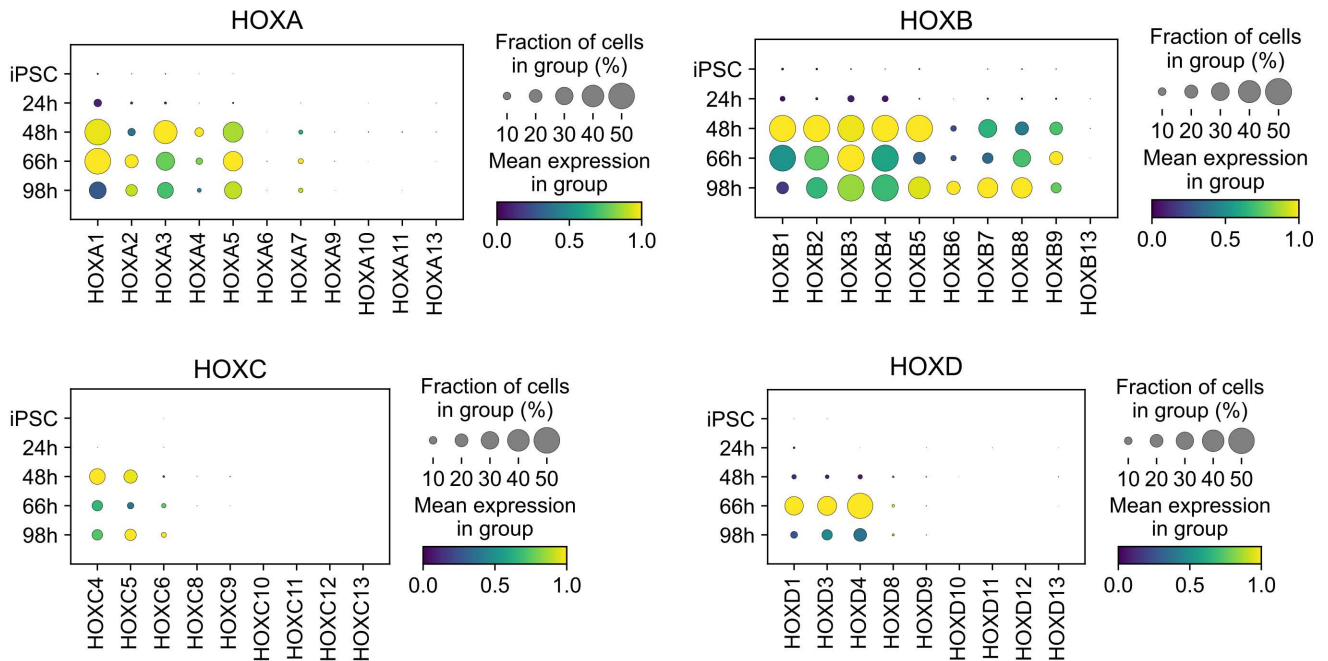

**Extended Data Fig.6 HOX genes expression in the in vitro models.**

Dot plots of HOX-family genes expression at various timepoints of the Segmentoid model (a) and the Somitoid model (b). The mean expression of each cluster is scaled per gene.

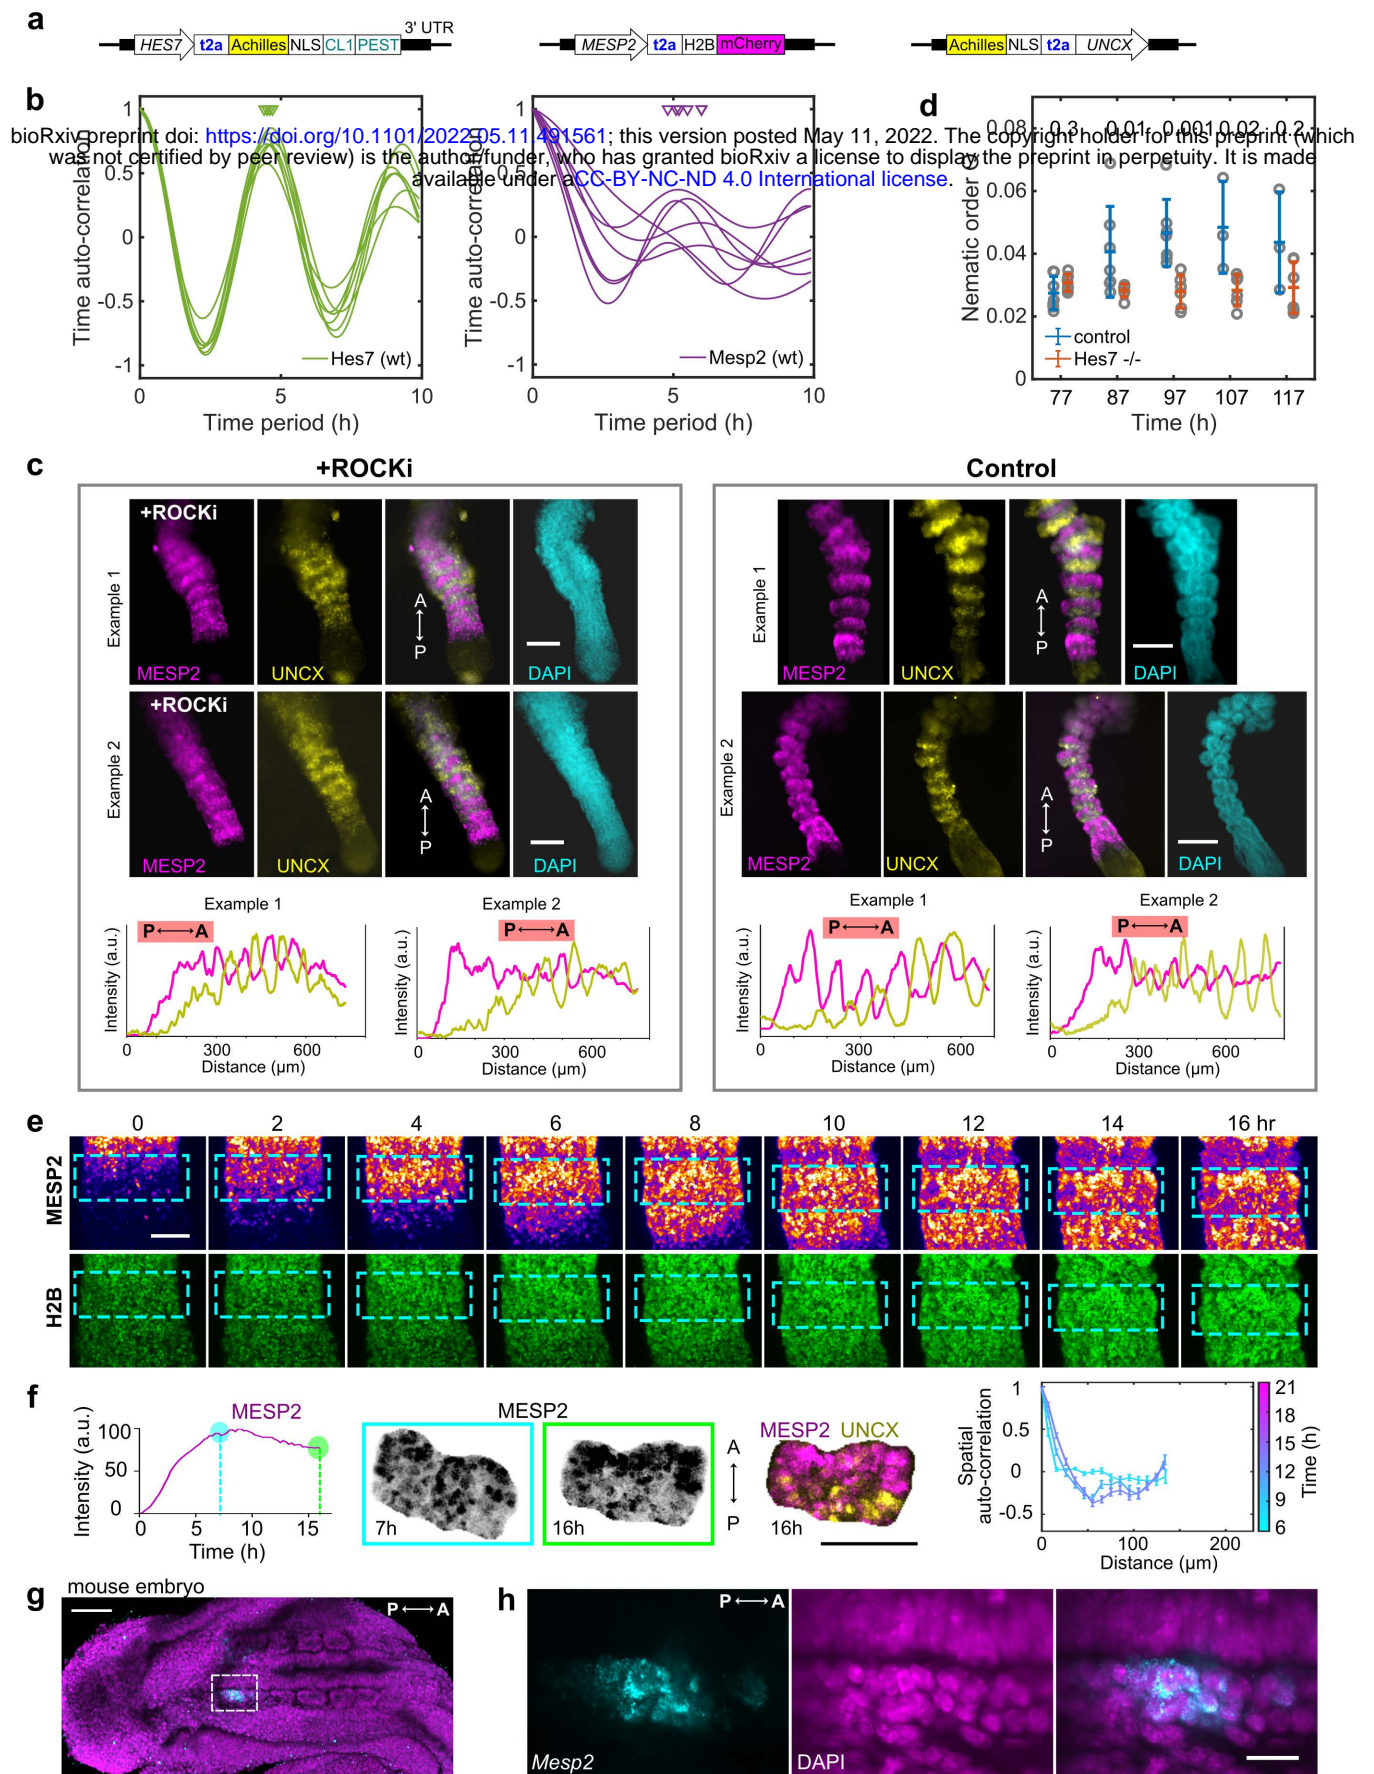

**Extended Data Fig.7 Antero-Posterior patterning in Segmentoids.**

**a**, Illustration of the design of the triple-reporter cell line. **b**, Time auto-correlation of HES7 and MESP2 reporter oscillations in individual WT Segmentoids (see Fig. 4d). Triangles indicate auto-correlation peaks, which in turn indicate oscillation period. **c**, Wide field images and graphs of reporter intensities from posterior (P) to anterior (A) end along 120h Segmentoids treated with 10µM ROCKi (left) and controls (right). **d**, Average nematic order of MESP2/UNCX signals in WT and HES7-null Segmentoids as a function of time. Statistics was performed with a Wilcoxon rank-sum test and P-value is shown. **e**, Time-lapse maximum-z-projection confocal images of MESP2 reporter (top) and H2B-GFP (bottom) in a Segmentoid. Cyan dotted-line boxes indicate the same developing segment. **f**, Temporal profile of MESP2 intensity (left), maximum-z-projection confocal images (middle), and spatial auto-correlation analysis of MESP2 and UNCX reporters as a function of time (right) in an individual developing segment in a Segmentoid. **g**, Merged maximum-z-projection confocal image of a mouse embryo stained with Mesp2 HCR probe (cyan) and DAPI (magenta). **h**, Enlarged view of the region indicated by the dotted-line box in g. Scale bars represent 200µm (c), 100µm (e, f, g) and 20µm (h).
